# Supplementary material
Source: Royal Society of Chemistry journal article supplement (doi:10.1039/d6gc01939k)
Supplement: d6gc01939k1.pdf [file d6gc01939k1.pdf]

## Supporting Information (SI) for

# Efficient Methanolysis of PET toward High-Purity DMT via Homo-Heterogeneous $\text{Mn}^{2+}/\text{Mn}_2\text{O}_3$ Synergistic Catalysis

Lei Yang<sup>[a]</sup>, Jiacheng Gao<sup>[a]</sup>, Min Su<sup>[b]</sup>, Li Yuan<sup>[a]</sup>, Yuan Wang<sup>[a]</sup>, Dajun Wang<sup>[b]</sup>, Heng Zheng<sup>[b]</sup>,  
Shaojun Yuan<sup>[a]</sup> and Like Ouyang<sup>[a]\*</sup>

<sup>[a]</sup> School of Chemical Engineering, Sichuan University, Chengdu, 610065, China

<sup>[b]</sup> State Key Laboratory of Porous Materials for Separation and Conversion, Southwest Institute  
of Chemical Co., Ltd, Chengdu, 610065, China

\* Corresponding E-mail: Like.ouyang@scu.edu.cn (L.K. Ouyang)

Number of Pages: 59

Number of Figures: 28

Number of Tables: 20

## Contents

|                                                                                                                                                                                                                                                                                                                                        |    |
|----------------------------------------------------------------------------------------------------------------------------------------------------------------------------------------------------------------------------------------------------------------------------------------------------------------------------------------|----|
| <b>Part 1 Supplementary Figures</b> .....                                                                                                                                                                                                                                                                                              | 1  |
| <b>Figure. S1.</b> Chromatographic peak sequence of products and internal standard. ....                                                                                                                                                                                                                                               | 1  |
| <b>Figure. S2.</b> Chromatographic internal standard curve for (a) EG, (b) DMT, (c) MHET and (d) BHET, using tetralin as the internal standard. ....                                                                                                                                                                                   | 2  |
| <b>Figure. S3.</b> Yield of products by single oxide and synergistic system at 170 °C (a, b) and 180 °C (c, d), calculated by internal standard method. ....                                                                                                                                                                           | 3  |
| <b>Figure. S4.</b> Yield of products at (a) different times (170 °C-10wt% catalyst) and (b) mass ratios of $\text{MnCl}_2 \cdot 4\text{H}_2\text{O}$ and $\text{Mn}_2\text{O}_3$ (170 °C-10wt% catalyst-1 h), calculated by internal standard method. ....                                                                             | 4  |
| <b>Figure. S5.</b> (a) product yields over repeated catalyst recycling, (b) yield of products from different commercial plastics, (c) yield of products under different $\text{Mn}^{2+}$ contents at 170 °C and 180 °C for 1 hour, calculated by internal standard method. ....                                                        | 5  |
| <b>Figure. S6.</b> (a) Conversion of PET and yield of products with different volumes of methanol at 180 °C for 1 hour. (b) conversion of PET and yield of products with different loading of catalyst at 180 °C for 1 hour. ....                                                                                                      | 6  |
| <b>Figure. S7.</b> Products of (a) $\text{MnO}$ , (b) $\text{Mn}_3\text{O}_4$ , (c) $\text{Mn}_2\text{O}_3$ , and (d) $\text{MnO}_2$ synergized by $\text{MnCl}_2 \cdot 4\text{H}_2\text{O}$ at 180 °C for 1 hour, products of (e) 1wt% and (f) 10wt% of $\text{MnCl}_2 \cdot 4\text{H}_2\text{O}$ alone at 180 °C for 1 hour. ....    | 7  |
| <b>Figure. S8.</b> (a) Degradation rate of PET catalyzed by different manganese salts; products of PET catalyzed by (b) $\text{MnSO}_4 \cdot \text{H}_2\text{O}$ and (c) $\text{Mn}(\text{NO}_3)_2 \cdot 4\text{H}_2\text{O}$ ; $\text{Mn}(\text{CH}_3\text{COO})_2 \cdot 4\text{H}_2\text{O}$ (d) before and (e) after reaction. .... | 8  |
| <b>Figure. S9.</b> Degradation rate of PET and yield of products catalyzed by different metal oxide and its corresponding synergistic systems, calculated by (a) normalization method and (b) internal standard method, respectively. ....                                                                                             | 9  |
| <b>Figure. S10.</b> Comparison of commercial plastics before and after reactions. ....                                                                                                                                                                                                                                                 | 10 |
| <b>Figure. S11.</b> (a) First-order kinetics at different temperatures; (b) Arrhenius diagram of the rate constant for PET methanolysis. ....                                                                                                                                                                                          | 11 |

|                                                                                                                                                                                                                                                                       |    |
|-----------------------------------------------------------------------------------------------------------------------------------------------------------------------------------------------------------------------------------------------------------------------|----|
| <b>Figure. S12.</b> $^1\text{H}$ NMR spectrum of pure DMT.....                                                                                                                                                                                                        | 12 |
| <b>Figure. S13.</b> $^1\text{H}$ NMR spectrum of pure MHET. ....                                                                                                                                                                                                      | 13 |
| <b>Figure. S14.</b> $^1\text{H}$ NMR spectrum of pure BHET. ....                                                                                                                                                                                                      | 14 |
| <b>Figure. S15.</b> $^1\text{H}$ NMR spectrum of products catalyzed by different mass ratios of $\text{MnCl}_2 \cdot 4\text{H}_2\text{O}$ and $\text{Mn}_2\text{O}_3$ (170 °C-10wt% catalyst).....                                                                    | 15 |
| <b>Figure. S16.</b> $^1\text{H}$ NMR spectrum of products catalyzed by synergistic system and different dosage of $\text{MnCl}_2 \cdot 4\text{H}_2\text{O}$ at 180 °C.....                                                                                            | 16 |
| <b>Figure. S17.</b> XRD patterns of (a) MnO (b) $\text{Mn}_3\text{O}_4$ (c) $\text{MnO}_2$ before and after reaction.....                                                                                                                                             | 17 |
| <b>Figure. S18.</b> (a) Infrared spectra of $\text{Mn}_2\text{O}_3$ before and after reaction; infrared spectra of $\text{MnO}_x$ before (b) and after (c) synergistic reaction. ....                                                                                 | 18 |
| <b>Figure. S19.</b> $\text{CO}_2$ -TPD spectra of $\text{Mn}_2\text{O}_3$ . ....                                                                                                                                                                                      | 19 |
| <b>Figure. S20.</b> Original XPS curves of MnOx: (a) Mn 2p, (b) Mn 3s.....                                                                                                                                                                                            | 20 |
| <b>Figure. S21.</b> XPS curves of Mn 2p: (a) MnO (b) $\text{Mn}_3\text{O}_4$ (c) $\text{MnO}_2$ , and Mn 3s: (d) MnO (e) $\text{Mn}_3\text{O}_4$ (f) $\text{MnO}_2$ . ((i) before reaction, (ii) after heterogeneous reaction, (iii) after synergistic reaction)..... | 22 |
| <b>Figure. S22.</b> SEM image of (a) MnO, (b) $\text{Mn}_3\text{O}_4$ , (c) $\text{MnO}_2$ (i) before and (ii) after synergistic reaction. ....                                                                                                                       | 23 |
| <b>Figure. S23.</b> $\text{N}_2$ adsorption-desorption isotherms of $\text{MnO}_x$ .....                                                                                                                                                                              | 24 |
| <b>Figure. S24.</b> (a) $^1\text{H}$ NMR spectra and (b) XRD patterns of products in each recycling cycles, (c) $^1\text{H}$ NMR spectra and (d) XRD patterns of commercial plastic products. ....                                                                    | 25 |
| <b>Figure. S25.</b> <i>In-situ</i> DRIFTS of MnO alone . ....                                                                                                                                                                                                         | 26 |
| <b>Figure. S26.</b> <i>In-situ</i> DRIFTS of $\text{Mn}_3\text{O}_4$ alone.....                                                                                                                                                                                       | 27 |
| <b>Figure. S27.</b> <i>In-situ</i> DRIFTS of $\text{MnO}_2$ alone . ....                                                                                                                                                                                              | 28 |
| <b>Figure. S28.</b> Process simulation of PET methanolysis through (a) synergistic system and (b) heterogeneous system by Aspen Plus . ....                                                                                                                           | 29 |
| <b>Part 2 Supplementary Tables</b> .....                                                                                                                                                                                                                              | 31 |
| <b>Table. S1.</b> Conversion of PET and yield of products (170 °C-10wt%-1h).....                                                                                                                                                                                      | 31 |

|                                                                                                                                                                                 |    |
|---------------------------------------------------------------------------------------------------------------------------------------------------------------------------------|----|
| <b>Table. S2.</b> Conversion of PET and yield of products (180 °C-10wt%-1h).....                                                                                                | 32 |
| <b>Table. S3.</b> Conversion of PET and yield of products at different times at 170 °C. ....                                                                                    | 33 |
| <b>Table. S4.</b> Conversion of PET and yield of products at different mass ratios (MnCl <sub>2</sub> ·4H <sub>2</sub> O:<br>Mn <sub>2</sub> O <sub>3</sub> ) at 170 °C.....    | 34 |
| <b>Table. S5.</b> Conversion of PET and yield of products at different temperatures when<br>MnCl <sub>2</sub> ·4H <sub>2</sub> O used alone. ....                               | 35 |
| <b>Table. S6.</b> Conversion of PET and product yields over repeated catalyst recycling. ....                                                                                   | 36 |
| <b>Table. S7.</b> Conversion of commercial PET and yield of products at 180 °C for 1 hour.....                                                                                  | 37 |
| <b>Table. S8.</b> Conversion of PET and yield of products with different volumes of methanol at<br>180 °C for 1 hour. ....                                                      | 38 |
| <b>Table. S9.</b> Conversion of PET and yield of products with different catalyst loading at 180 °C<br>for 1 hour. ....                                                         | 39 |
| <b>Table. S10.</b> Conversion of PET and yield of products with heterogeneous ('i') and<br>synergistic ('ii') system for oxidation with other transition metals.....            | 40 |
| <b>Table. S11.</b> Residual metal content in the solution catalyzed by metal oxides .....                                                                                       | 41 |
| <b>Table. S12.</b> Residual manganese content in the product before and after washing.....                                                                                      | 42 |
| <b>Table. S13.</b> Ratio of MnCl <sub>2</sub> ·4H <sub>2</sub> O in different catalytic systems (comparison of mass and<br>molar ratio), with 10wt% total catalyst of PET. .... | 43 |
| <b>Table. S14.</b> MnO XPS spectral fitting. ....                                                                                                                               | 44 |
| <b>Table. S15.</b> Mn <sub>3</sub> O <sub>4</sub> XPS spectral fitting.....                                                                                                     | 45 |
| <b>Table. S16.</b> Mn <sub>2</sub> O <sub>3</sub> XPS spectral fitting.....                                                                                                     | 46 |
| <b>Table. S17.</b> MnO <sub>2</sub> XPS spectral fitting. ....                                                                                                                  | 47 |
| <b>Table. S18.</b> Mass balance of PET methanolysis in synergistic system. ....                                                                                                 | 48 |
| <b>Table. S19.</b> Mass balance of PET methanolysis in synergistic system (continued).....                                                                                      | 49 |
| <b>Table. S20.</b> Mass balance of PET methanolysis in synergistic system (continued).....                                                                                      | 50 |
| <b>Table. S21.</b> Mass balance of PET methanolysis in heterogeneous system. ....                                                                                               | 51 |
| <b>Table. S22.</b> Mass balance of PET methanolysis in heterogeneous system (continued).....                                                                                    | 52 |

|                                                                    |    |
|--------------------------------------------------------------------|----|
| <b>Table. S23.</b> Comparison of economic balance.....             | 53 |
| <b>Table. S24.</b> Comparison of electricity consumption.....      | 54 |
| <b>Table. S25.</b> Details of tower equipment parameters. ....     | 55 |
| <b>Table. S26.</b> Comparison of equipment installation cost. .... | 56 |
| <b>Table. S27.</b> Details of heat exchanger parameters. ....      | 57 |
| <b>Table. S28.</b> Details of reactor parameters. ....             | 58 |
| <b>Table. S29.</b> Detailed utility parameters.....                | 59 |

## Part 1 Supplementary Figures

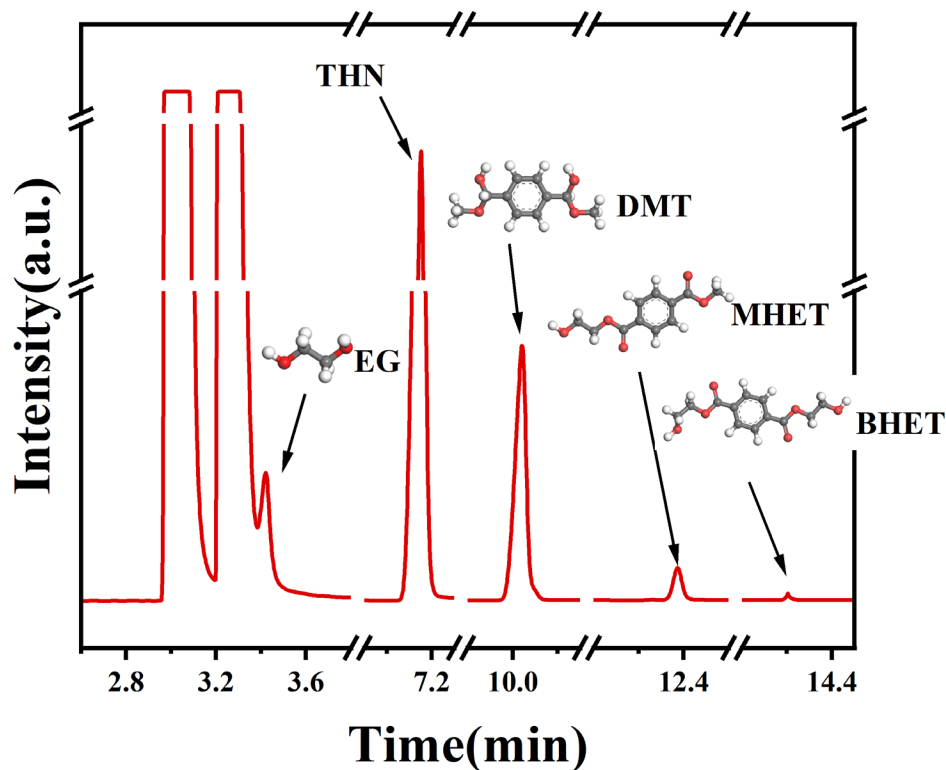

**Figure. S1.** Chromatographic peak sequence of products and internal standard.

*Note:* The liquid products were qualitatively identified and quantitatively analyzed using a Gas Chromatograph (GC2060). A micro-syringe was employed for direct liquid injection into the injector port. Argon served as the carrier gas. Separation was achieved using an HP-5 capillary column (30 m  $\times$  0.32 mm  $\times$  0.25  $\mu$ m, Agilent) with a temperature-programmed method, and the signals were detected by a flame ionization detector (FID). The instrumental parameters were set as follows: both the injector port and the detector were maintained at 300  $^{\circ}$ C. The oven temperature was programmed starting at 100  $^{\circ}$ C, then ramped at a rate of 20  $^{\circ}$ C/min to 300  $^{\circ}$ C, and finally held at 300  $^{\circ}$ C for 12 minutes. The injection volume was 1  $\mu$ L, the internal standard substance is tetrahydronaphthalene.

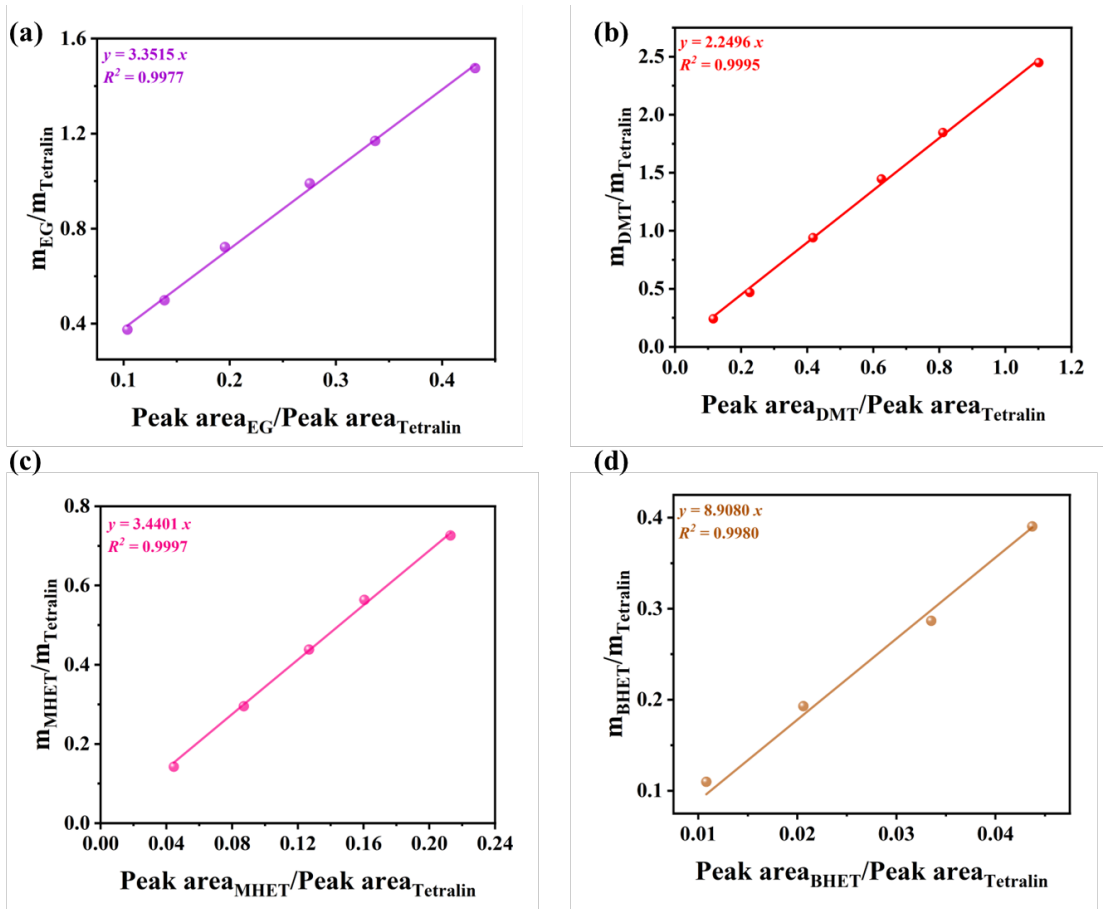

**Figure. S2.** Chromatographic internal standard curve for (a) EG, (b) DMT, (c) MHET and (d) BHET, using tetralin as the internal standard.

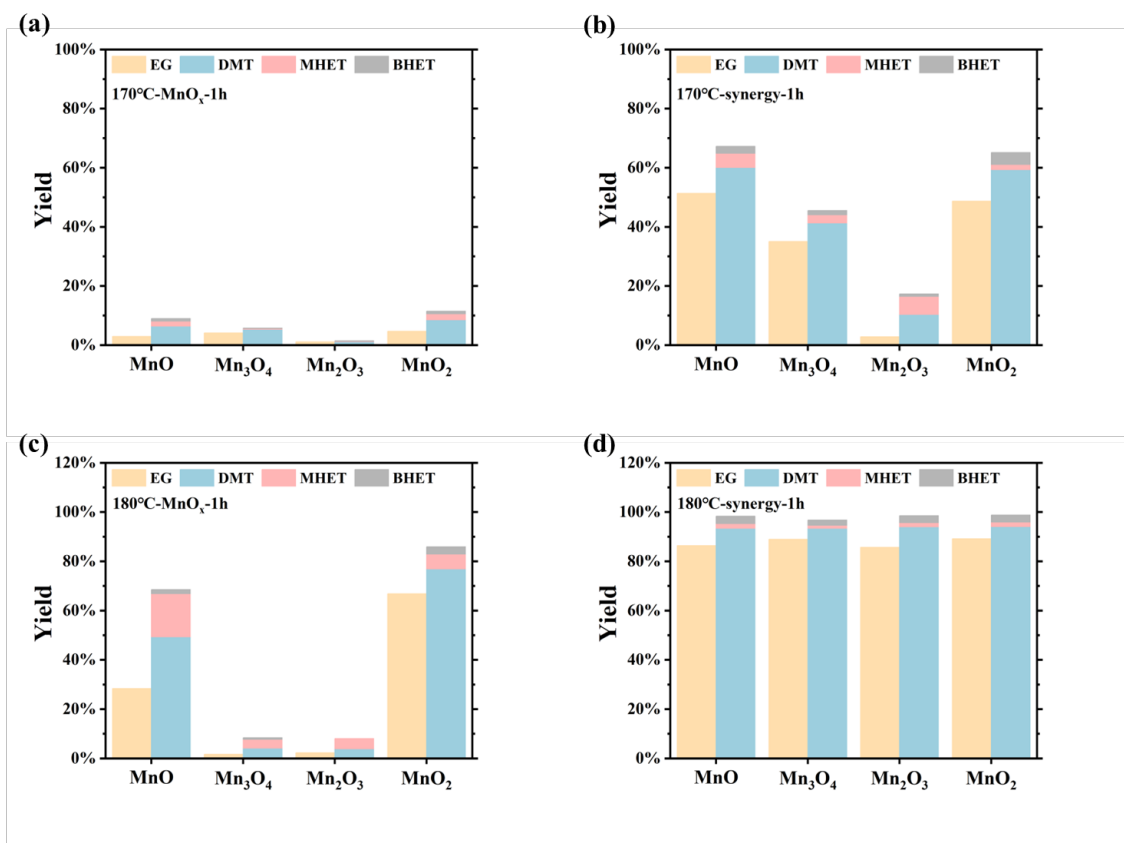

**Figure. S3.** Yield of products by single oxide and synergistic system at 170 °C (a, b) and 180 °C (c, d), calculated by internal standard method.

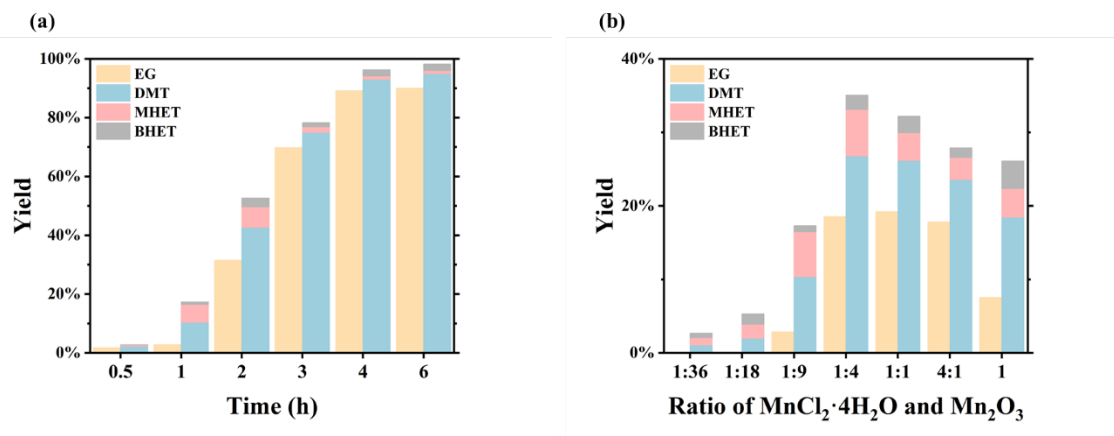

**Figure. S4.** Yield of products at (a) different times (170 °C-10wt% catalyst) and (b) mass ratios of MnCl<sub>2</sub>·4H<sub>2</sub>O and Mn<sub>2</sub>O<sub>3</sub> (170 °C-10wt% catalyst-1 h), calculated by internal standard method.

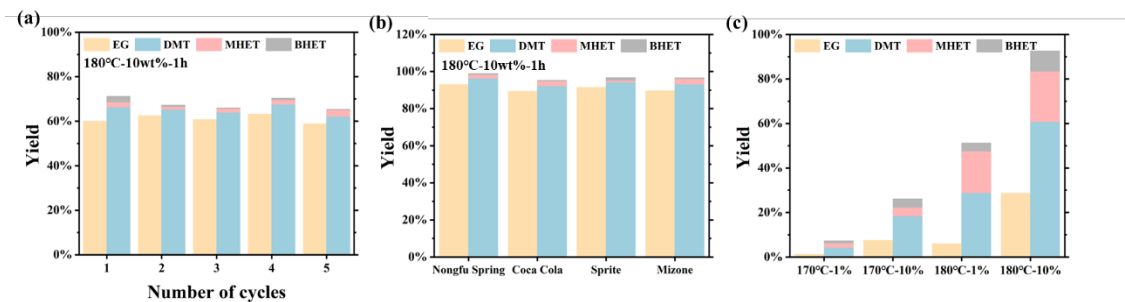

**Figure. S5.** (a) product yields over repeated catalyst recycling, (b) yield of products from different commercial plastics, (c) yield of products under different  $Mn^{2+}$  contents at 170 °C and 180 °C for 1 hour, calculated by internal standard method.

*Note:* The total catalyst mass is 10% ( $MnCl_2 \cdot 4H_2O$ :  $Mn_2O_3=1:9$ ) of the PET mass for Fig.a and b. In each recycling cycles, fresh 50% mass fraction of homogeneous and heterogeneous catalysts are added. The homogeneous catalyst is obtained by freezing the methanol solution from the previous reaction and separating the solid phase products to obtain a methanol solution containing manganese ions. The heterogeneous catalyst is obtained by dissolving the products in chloroform and centrifuging the solution to dry it.

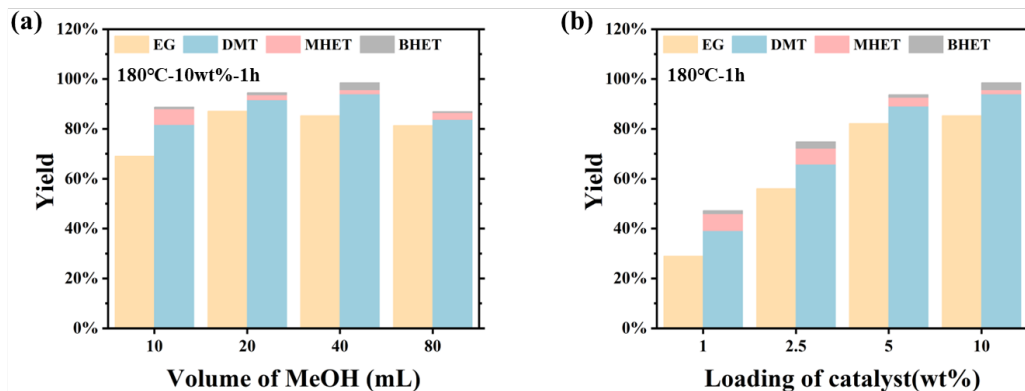

**Figure. S6.** (a) Conversion of PET and yield of products with different volumes of methanol at 180 °C for 1 hour. (b) conversion of PET and yield of products with different loading of catalyst at 180 °C for 1 hour.

*Note:* For Fig. S6a, the total catalyst mass is 10% ( $\text{MnCl}_2 \cdot 4\text{H}_2\text{O}$ :  $\text{Mn}_2\text{O}_3=1:9$ ) of the PET mass, due to equipment limitations, in actual reactions, the 10 mL methanol group experiment used 20 ml methanol and 2 g PET, while the 80 ml methanol group experiment used 40 ml methanol and 0.5g PET which leads to a decrease in its PET conversion rate as its  $\text{Mn}^{2+}$  concentration is lower than that of other groups in the experiment.

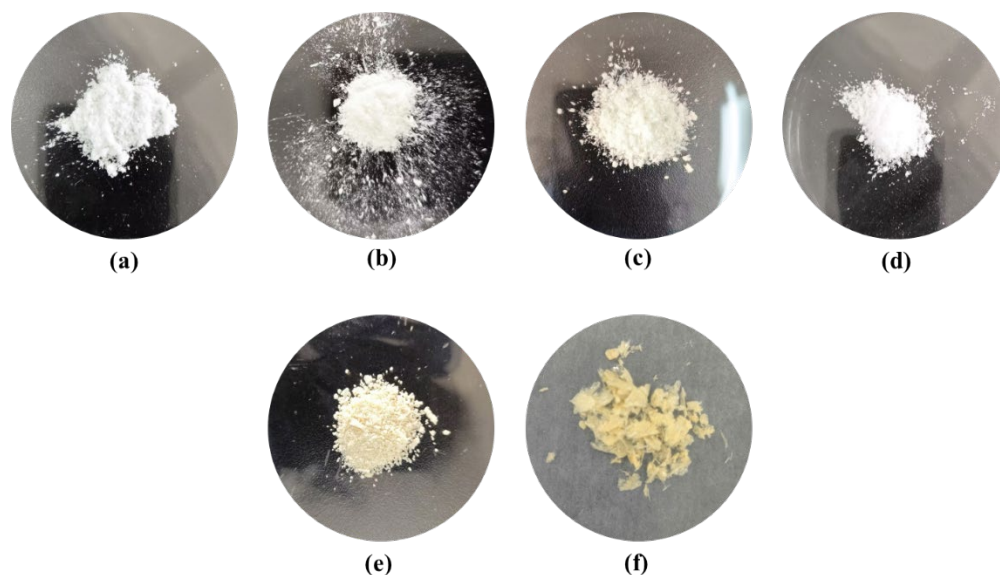

**Figure. S7.** Products of (a) MnO, (b) Mn<sub>3</sub>O<sub>4</sub>, (c) Mn<sub>2</sub>O<sub>3</sub>, and (d) MnO<sub>2</sub> synergized by MnCl<sub>2</sub>·4H<sub>2</sub>O at 180 °C for 1 hour, products of (e) 1 wt% and (f) 10 wt% of MnCl<sub>2</sub>·4H<sub>2</sub>O alone at 180 °C for 1 hour.

*Note:* Although increasing the loading of homogeneous MnCl<sub>2</sub>·4H<sub>2</sub>O from 1% to 10% could achieve complete PET degradation, the DMT selectivity dropped substantially (Fig. S5c), and the product color turned intensely yellow (Fig. S7e and S7f). In contrast, the synergistic system not only achieved efficient degradation but also yielded nearly white products (Fig. S7a-d), demonstrating its combined advantages in selectivity and product purity.

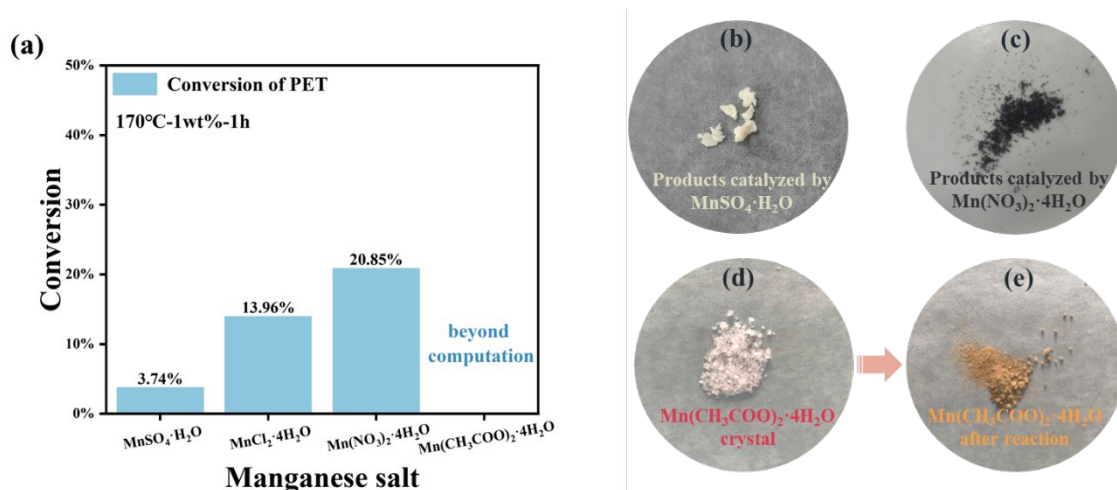

**Figure. S8.** (a) Degradation rate of PET catalyzed by different manganese salts; products of PET catalyzed by (b)  $\text{MnSO}_4 \cdot \text{H}_2\text{O}$  and (c)  $\text{Mn}(\text{NO}_3)_2 \cdot 4\text{H}_2\text{O}$ ;  $\text{Mn}(\text{CH}_3\text{COO})_2 \cdot 4\text{H}_2\text{O}$  (d) before and (e) after reaction.

*Note:* Fig. (a) shows the degradation efficiency using the homogeneous catalyst alone at 170 °C for 1 hour. For tetrahydrate manganese acetate, the formation of a brownish-yellow new species prevented the calculation of the conversion rate based on the mass difference of solids before and after the reaction. Figs. (b) and (c) present the products from PET depolymerization by hydrated manganese sulfate and tetrahydrate manganese nitrate, respectively. Figs. (d) and (e) provide a comparative view of the samples before and after the reaction with tetrahydrate manganese acetate.

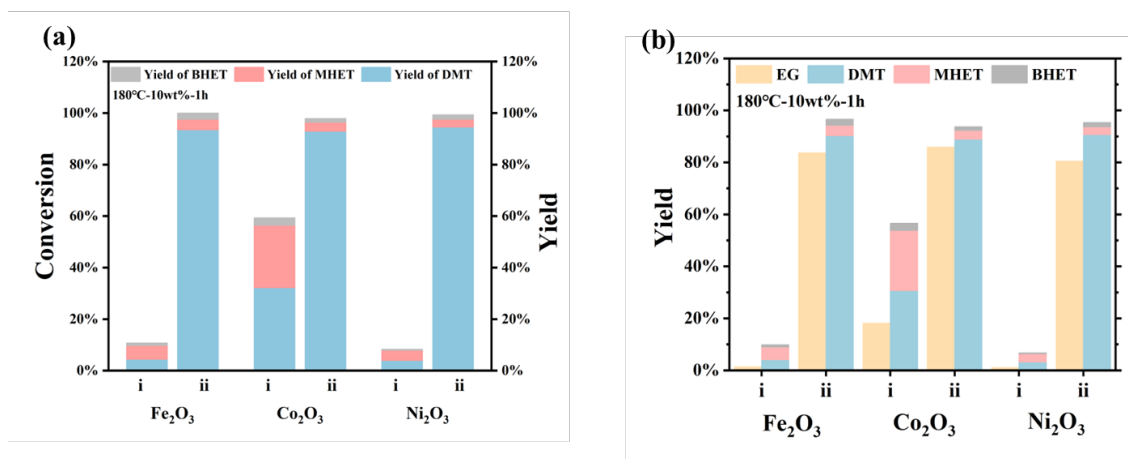

**Figure. S9.** Degradation rate of PET and yield of products catalyzed by different metal oxide and its corresponding synergistic systems, calculated by (a) normalization method and (b) internal standard method, respectively.

*Note:* The experimental conditions are 180 °C-1 h, with 1 g PET , 0.1 g catalyst and 40 mL MeOH, like the typical experiment. In the synergistic experiment corresponding to each oxide, the catalyst was still added in a homogeneous and heterogenous ratio of 1:9, using FeCl<sub>3</sub>·6H<sub>2</sub>O, CoCl<sub>2</sub>·6H<sub>2</sub>O, and NiCl<sub>2</sub>·6H<sub>2</sub>O as the homogeneous component, respectively. Similarly, ‘i’ denotes the single oxide system and ‘ii’ denotes the synergistic system.

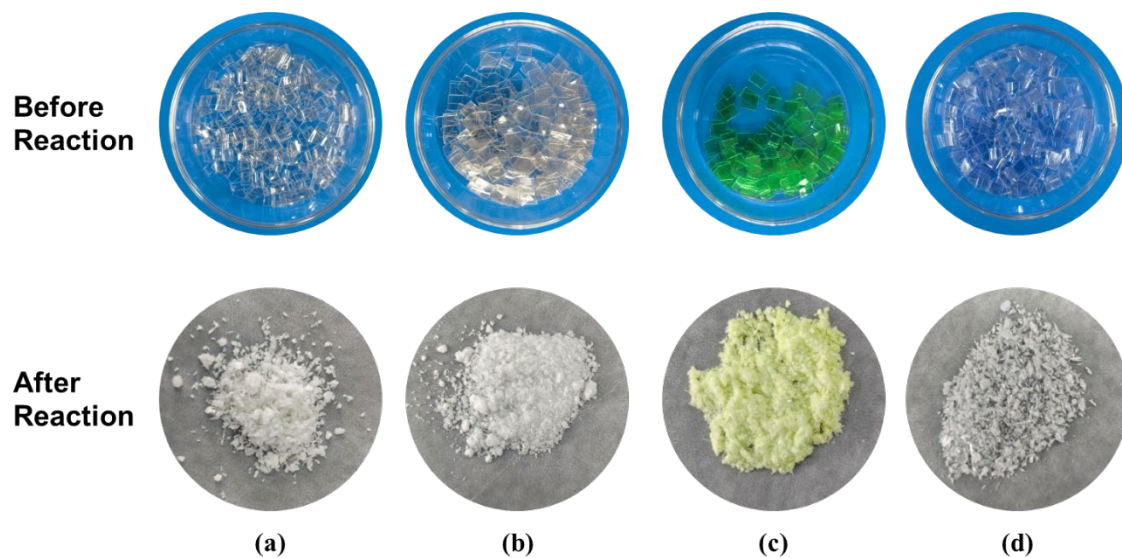

**Figure. S10.** Comparison of commercial plastics before and after reactions. (a) NoFu Spring, (b) Coca-Cola, (c) Sprite, (d) Mizone

*Note:* Commercial PET is cut into fragments and washed before being used for reaction

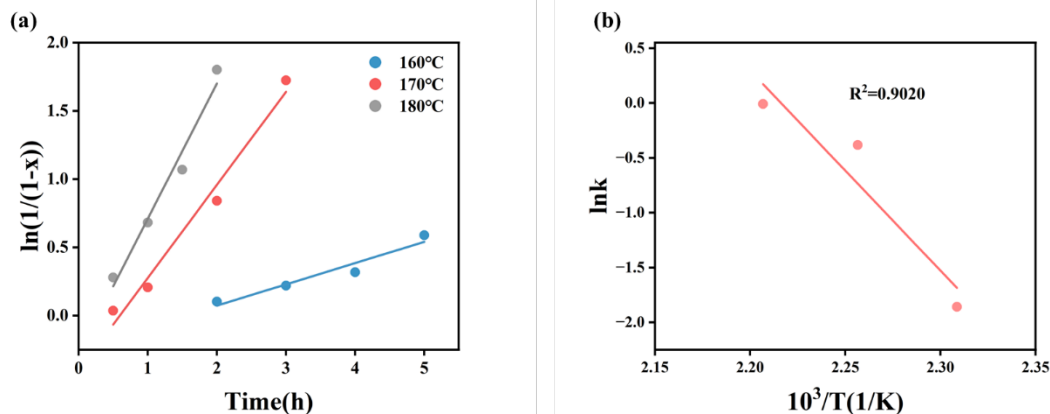

**Figure. S11.** (a) First-order kinetics at different temperatures; (b) Arrhenius diagram of the rate constant for PET methanolysis.

*Note:* To provide fundamental data for industrial process simulation (Aspen), kinetic studies were conducted on the  $Mn_2O_3/MnCl_2$  synergistic system. The reaction followed a first-order kinetic model. Fitting the data with the Arrhenius equation yielded an apparent activation energy ( $E_a$ ) of 151.61 kJ/mol for this synergistic degradation process. The catalyst proportion was reduced to 1% of the PET mass at 180 °C due to the PET conversion rate can reach 100% in a short period of time when 10wt% total catalyst was fed.

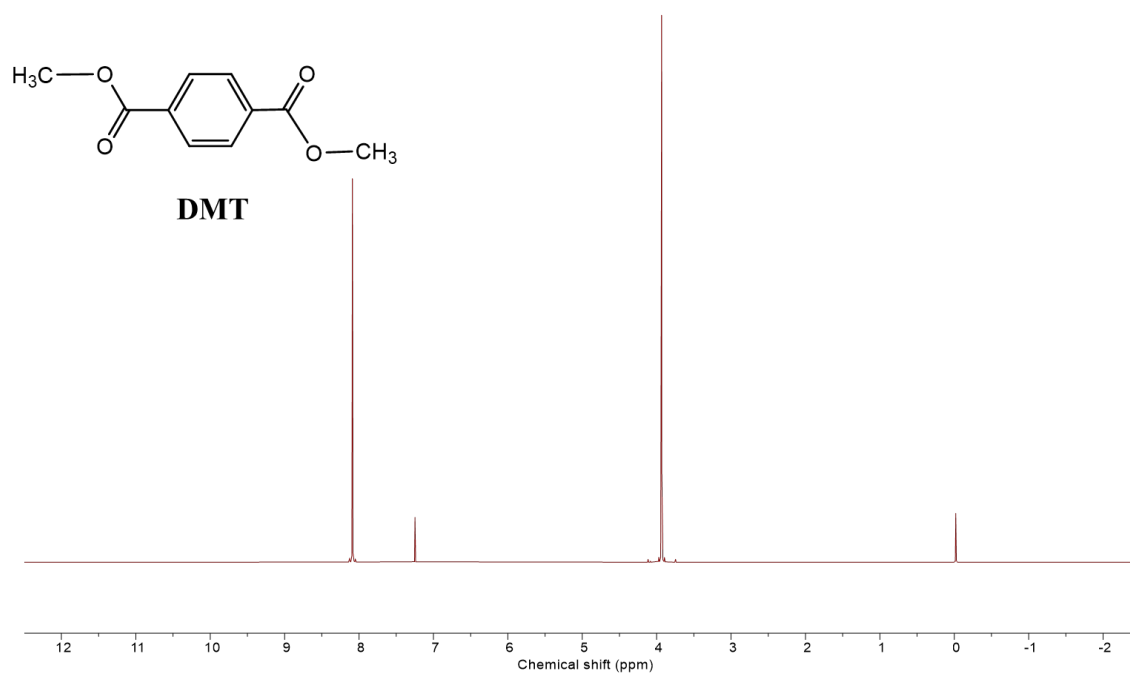

**Figure. S12.** <sup>1</sup>H NMR spectrum of pure DMT.

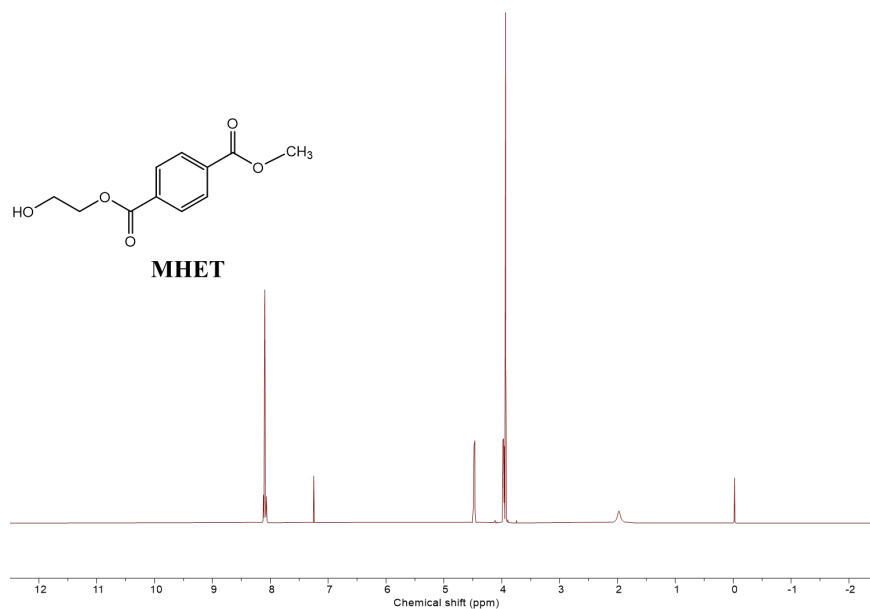

**Figure. S13.** <sup>1</sup>H NMR spectrum of pure MHET.

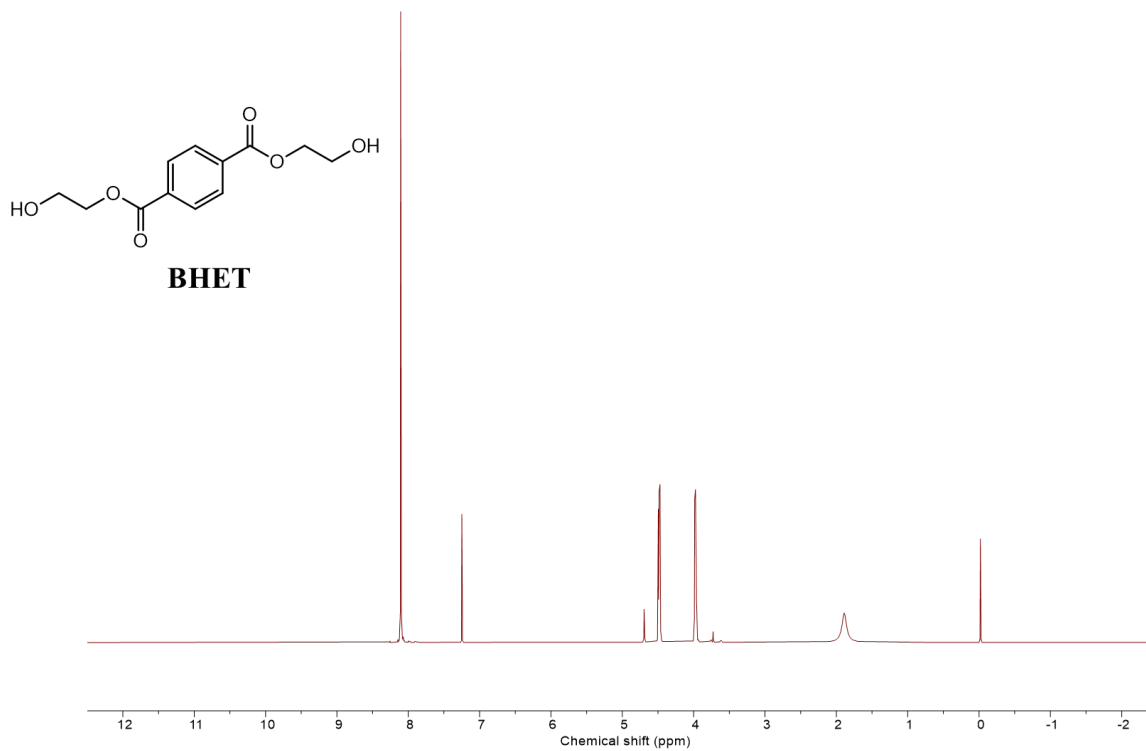

**Figure. S14.** <sup>1</sup>H NMR spectrum of pure BHET.

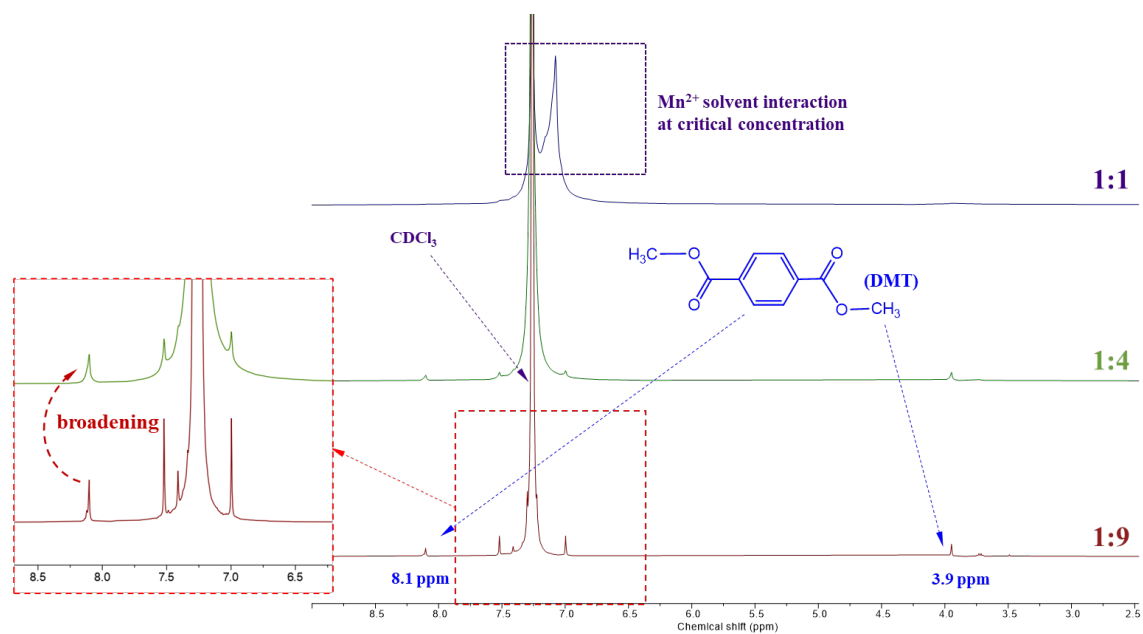

**Figure. S15.** <sup>1</sup>H NMR spectrum of products catalyzed by different mass ratios of MnCl<sub>2</sub>·4H<sub>2</sub>O and Mn<sub>2</sub>O<sub>3</sub> (170 °C-10wt% catalyst).

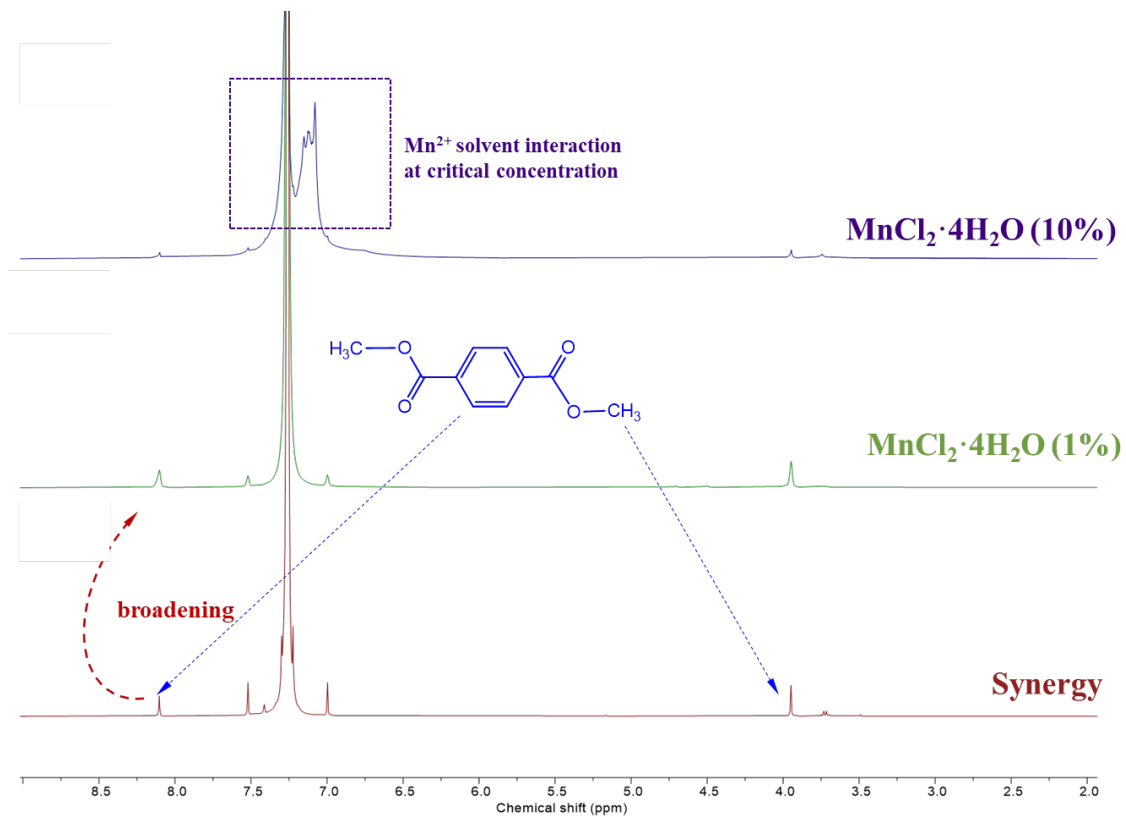

**Figure. S16.** <sup>1</sup>H NMR spectrum of products catalyzed by synergistic system and different dosage of MnCl<sub>2</sub>·4H<sub>2</sub>O at 180 °C.

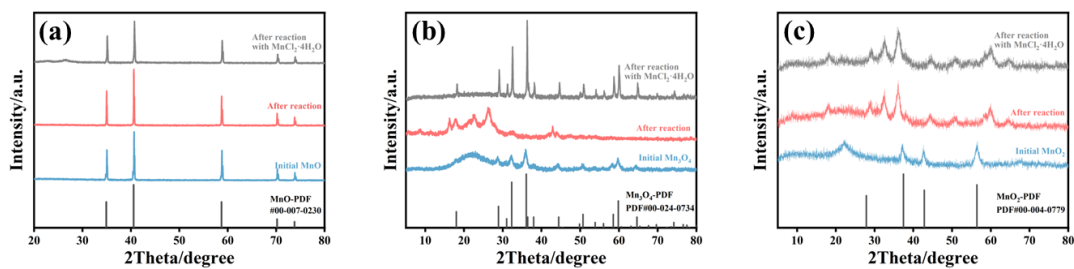

**Figure. S17.** XRD patterns of (a) MnO (b) Mn<sub>3</sub>O<sub>4</sub> (c) MnO<sub>2</sub> before and after reaction.

*Note:* The crystal structures of the catalysts were characterized by X-ray diffraction using a Mini Flex 600 diffractometer. The measurements were performed with Cu K $\alpha$ 1 radiation ( $\lambda = 1.54 \text{ \AA}$ ) at an operating voltage of 40 kV. Data were collected in the  $2\theta$  range of  $5^\circ$  to  $80^\circ$  with a step size of  $0.02^\circ$  and a scan rate of  $5^\circ/\text{min}$ . The obtained XRD patterns were analyzed using Jade software, and phase identification was achieved by comparing the diffraction patterns with standard reference cards (PDF database).

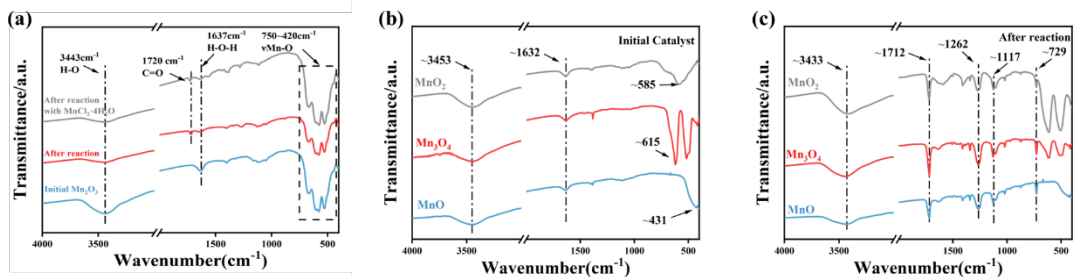

**Figure. S18.** (a) Infrared spectra of Mn<sub>2</sub>O<sub>3</sub> before and after reaction; infrared spectra of MnO<sub>x</sub> before (b) and after (c) synergistic reaction.

*Note:* For Fourier-Transform Infrared (FT-IR) analysis, samples were prepared using the standard KBr pellet method. A small amount of the sample was mixed and thoroughly ground with approximately 120 mg of potassium bromide (KBr). The homogeneous mixture was then pressed into a thin, transparent pellet under a pressure of 10 bar for about 15 seconds. The resulting pellet was subsequently analyzed in transmission mode to collect the infrared absorption spectrum.

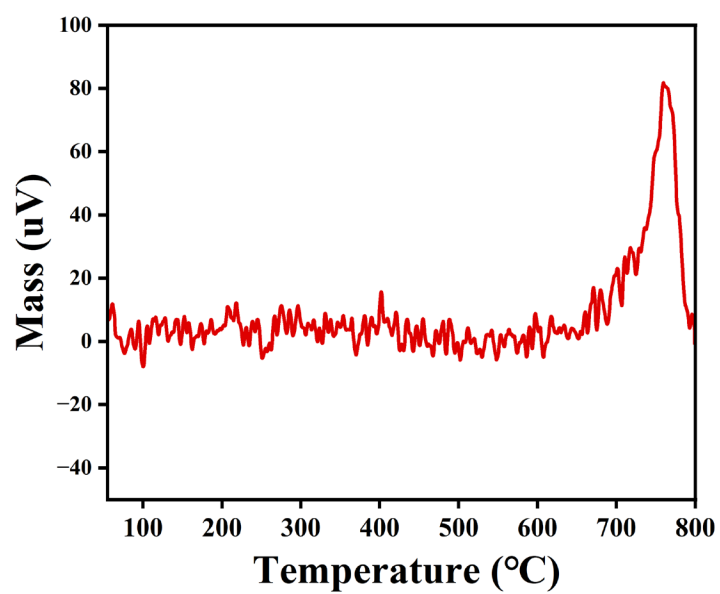

**Figure. S19.** CO<sub>2</sub>-TPD spectra of Mn<sub>2</sub>O<sub>3</sub>.

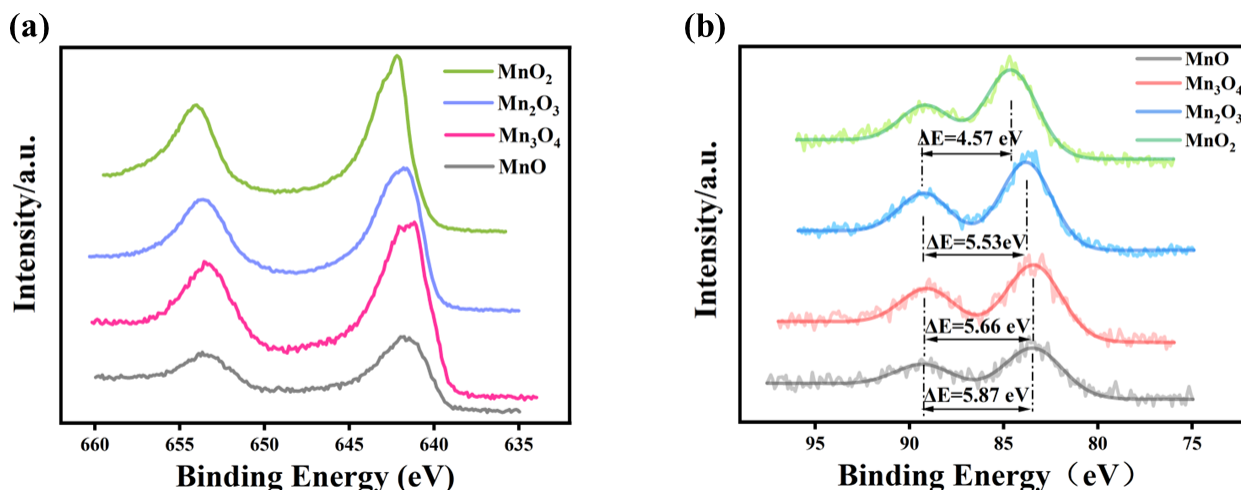

**Figure. S20.** Original XPS curves of  $\text{MnO}_x$ : (a) Mn 2p, (b) Mn 3s.

*Note:* The characterization parameters of XPS were as follows: the X-ray excitation source was monochromatic Al-K $\alpha$  radiation (1486.6 eV), operating at 12 kV with a pass energy of 150.0 eV and a step size of 1 eV. The acquired data were processed using Avantage V6.9 software. The binding energy scale was calibrated by referencing the standard C 1s peak at 284.8 eV. The spectra were fitted using a Gaussian-Lorentzian (G-L) Model, and this same fitting procedure was applied to all subsequent data analysis unless otherwise specified.

To analyze the manganese oxidation states, we examined both the Mn 2p and Mn 3s core-level spectra. For the Mn 2p region, the spectrum typically presents as a broad envelope with multiple features. This complexity arises from the strong exchange interaction between the 3d electrons and the 2p core hole, leading to multiplet splitting. Additionally, the covalent character of the Mn–O bond can result in charge transfer satellite peaks due to partial screening of the core hole by ligand (O 2p) electrons. Consequently, the subtle differences in the Mn 2p line shapes among various manganese oxides make unambiguous determination of the oxidation state challenging from this region alone. In contrast, the Mn 3s spectrum consistently shows a well-resolved doublet, which is less susceptible to chemical environment effects. The splitting energy ( $\Delta E$ ) between these two peaks originates from the exchange coupling between the 3s core hole and the unpaired electrons

in the 3d orbital. As the manganese oxidation state increases, the number of unpaired 3d electrons decreases, weakening this exchange interaction and causing a systematic reduction in  $\Delta E$ . Therefore, the Mn 3s doublet provides a more reliable metric for determining the average manganese oxidation state.

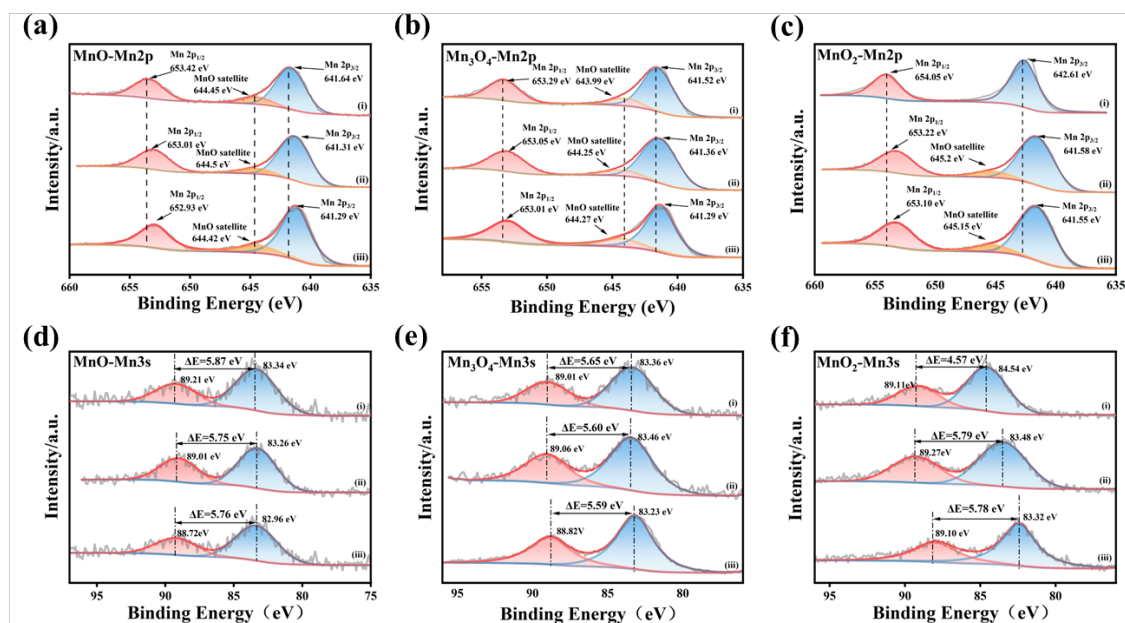

**Figure. S21.** XPS curves of Mn 2p: (a) MnO (b)  $\text{Mn}_3\text{O}_4$  (c)  $\text{MnO}_2$ , and Mn 3s: (d) MnO (e)  $\text{Mn}_3\text{O}_4$  (f)  $\text{MnO}_2$ . ((i) before reaction, (ii) after heterogeneous reaction, (iii) after synergistic reaction).

*Note:* For MnO and  $\text{Mn}_3\text{O}_4$ , the slight change in their Mn 3s  $\Delta E$  value indicates that their leaching in methanol primarily occurs at the material surface. This surface process suggests they cannot maintain their activity over prolonged high-temperature reactions. In contrast, for  $\text{MnO}_2$ , the manganese valence state directly changed from +4 to a mixed +2/+3 state. This observation further underscores the superior stability of the +3 oxidation state (as in  $\text{Mn}_2\text{O}_3$ ) in the methanolysis environment.

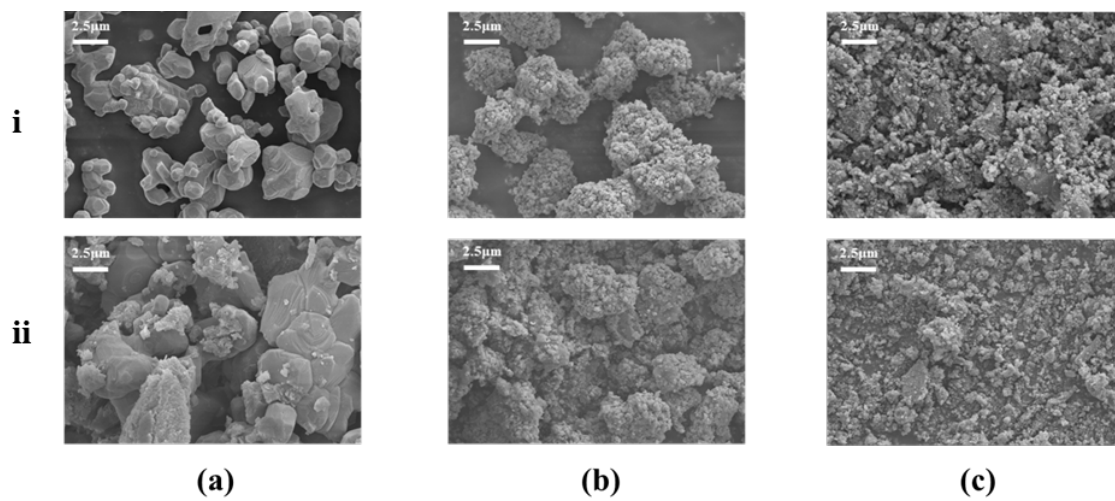

**Figure. S22.** SEM image of (a) MnO, (b) Mn<sub>3</sub>O<sub>4</sub>, (c) MnO<sub>2</sub> (i) before and (ii) after synergistic reaction.

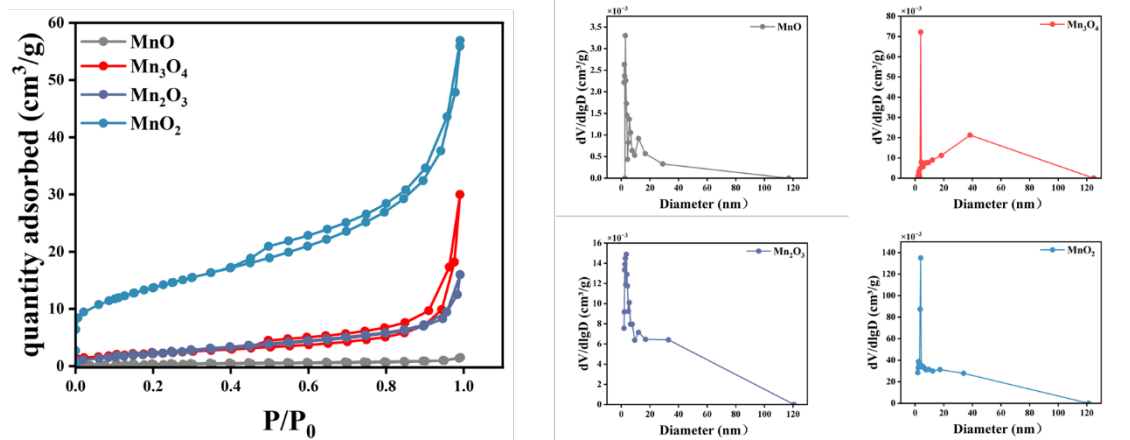

**Figure. S23.** N<sub>2</sub> adsorption-desorption isotherms of MnO<sub>x</sub>.

*Note:* The textural properties of various MnO<sub>x</sub> catalysts were characterized by N<sub>2</sub> adsorption-desorption measurements. The isotherm of Mn<sub>2</sub>O<sub>3</sub> can be classified as type IV with a distinct H3 hysteresis loop, confirming its mesoporous structure. The corresponding pore size distribution, calculated using the Barrett-Joyner-Halenda (BJH) method, showed a sharp peak centered around 12 nm, indicating uniform mesopores. In comparison, MnO<sub>2</sub> and Mn<sub>3</sub>O<sub>4</sub> also displayed type IV isotherms but with broader pore size distributions. MnO exhibited a characteristic type II isotherm with very low uptake, suggesting a nearly non-porous structure. The specific surface areas followed the order: MnO<sub>2</sub> > Mn<sub>3</sub>O<sub>4</sub> > Mn<sub>2</sub>O<sub>3</sub> > MnO. Therefore, Mn<sub>2</sub>O<sub>3</sub> achieves an optimal trade-off between specific surface area and structural stability.

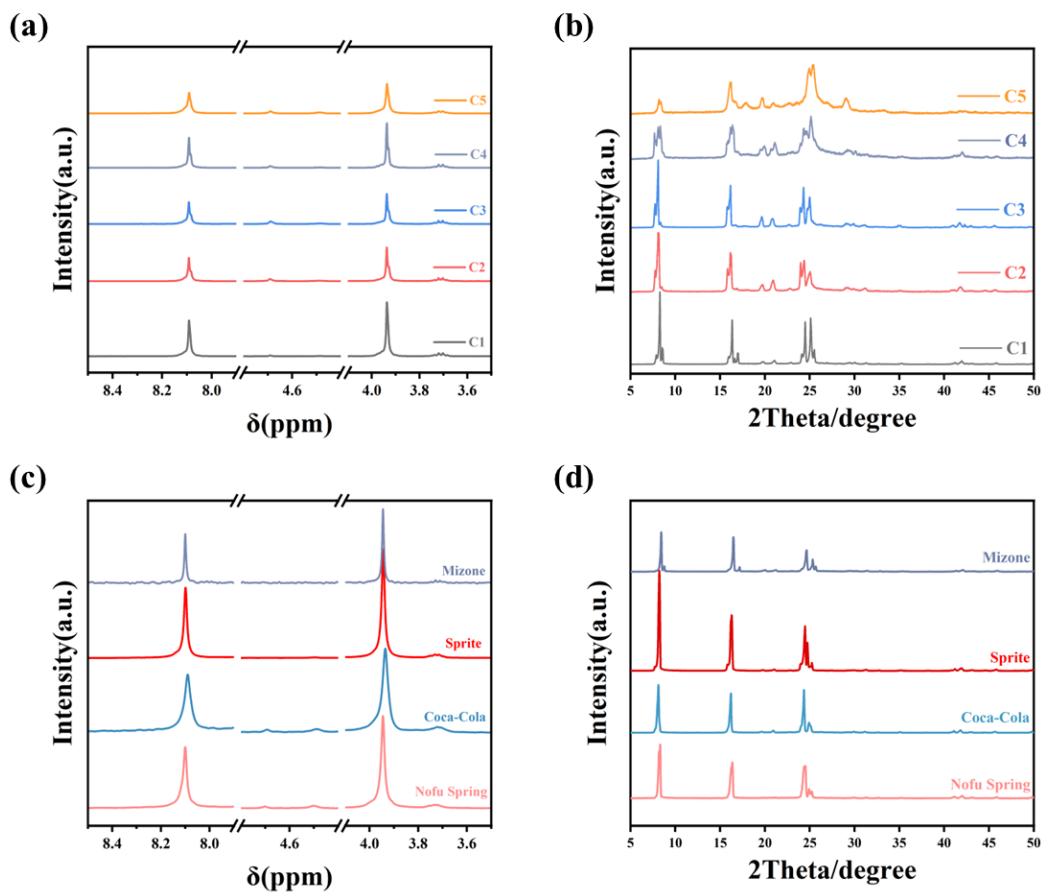

**Figure. S24.** (a) <sup>1</sup>H NMR spectra and (b) XRD patterns of products in each recycling cycles, (c) <sup>1</sup>H NMR spectra and (d) XRD patterns of commercial plastic products.

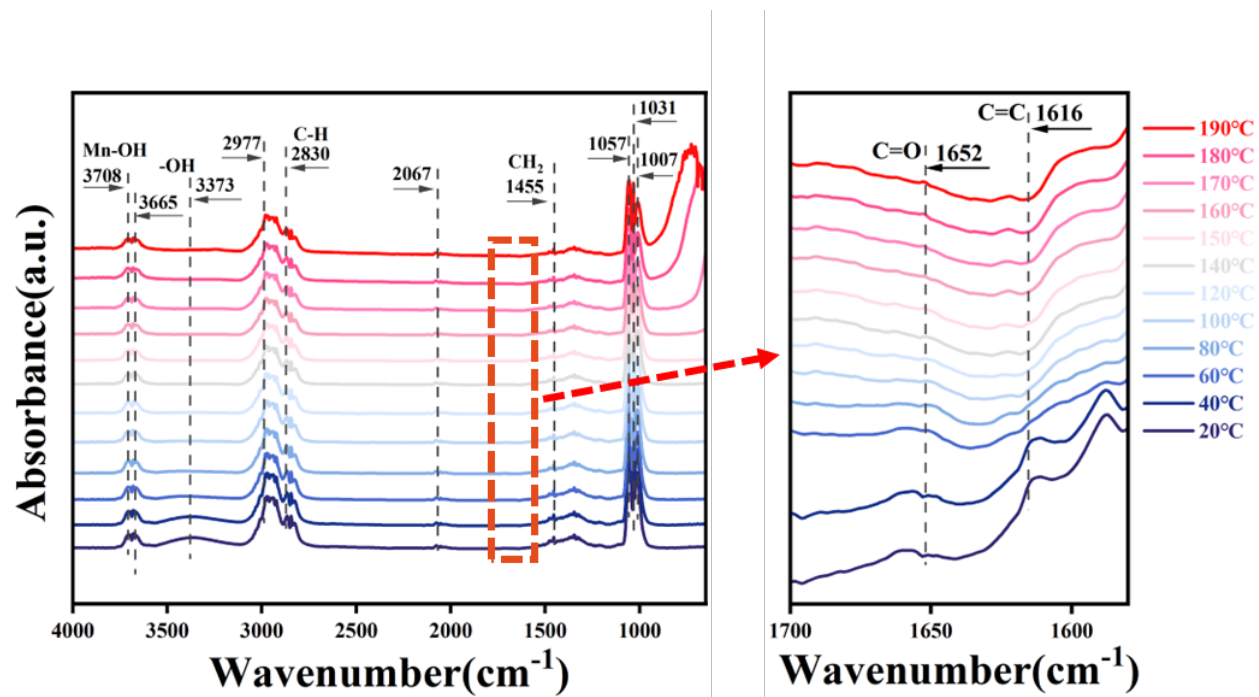

Figure. S25. *In-situ* DRIFTS of MnO alone .

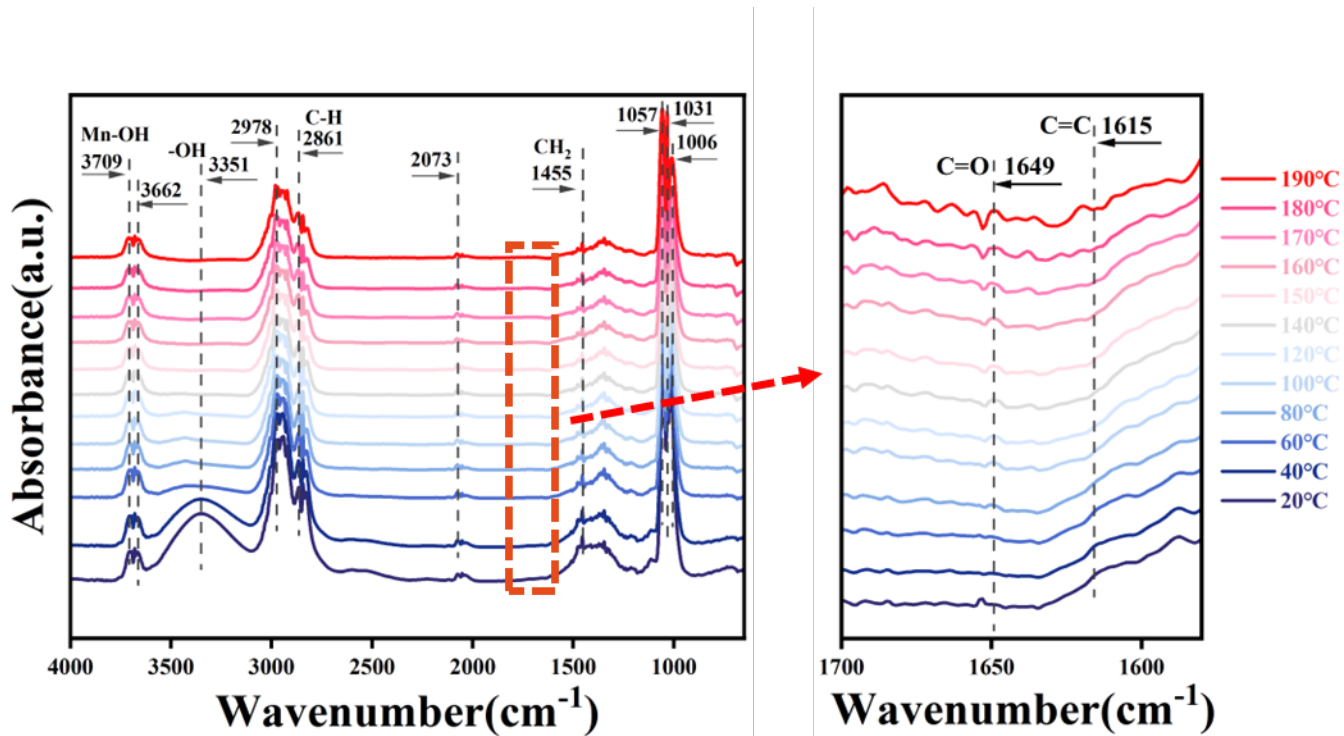

Figure. S26. *In-situ* DRIFTS of Mn<sub>3</sub>O<sub>4</sub> alone.

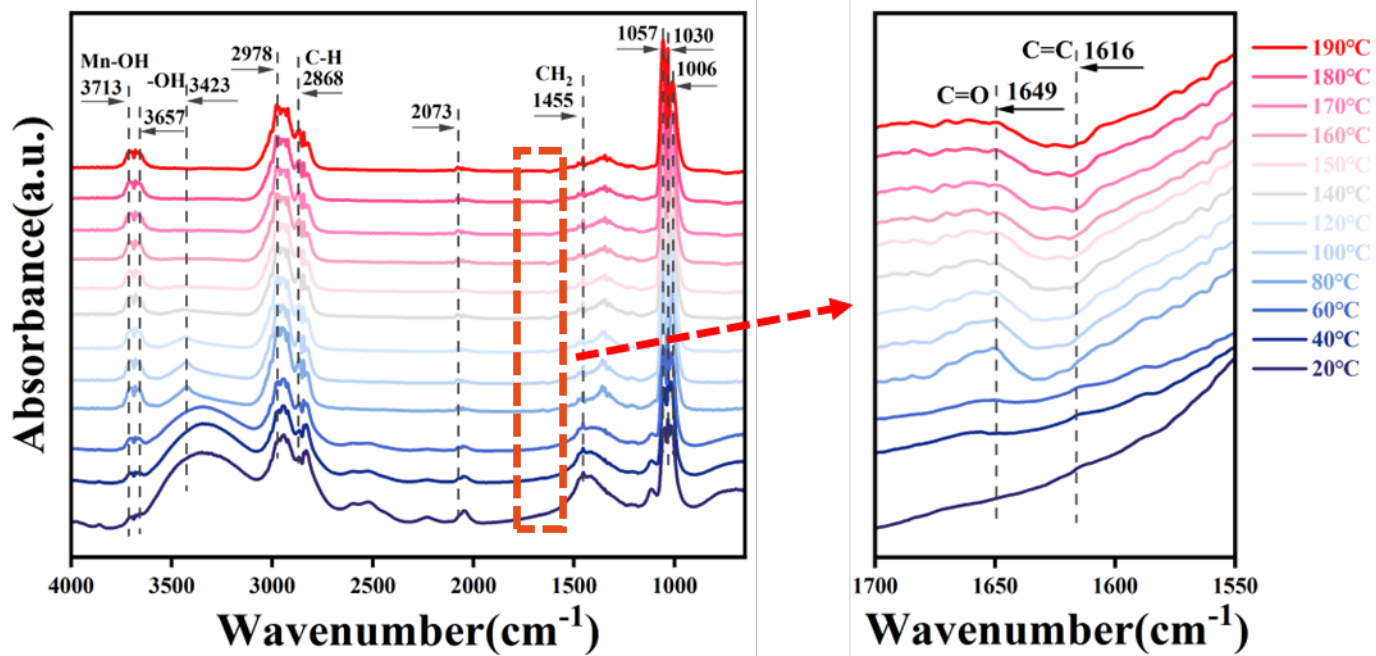

Figure. S27. *In-situ* DRIFTS of MnO<sub>2</sub> alone .

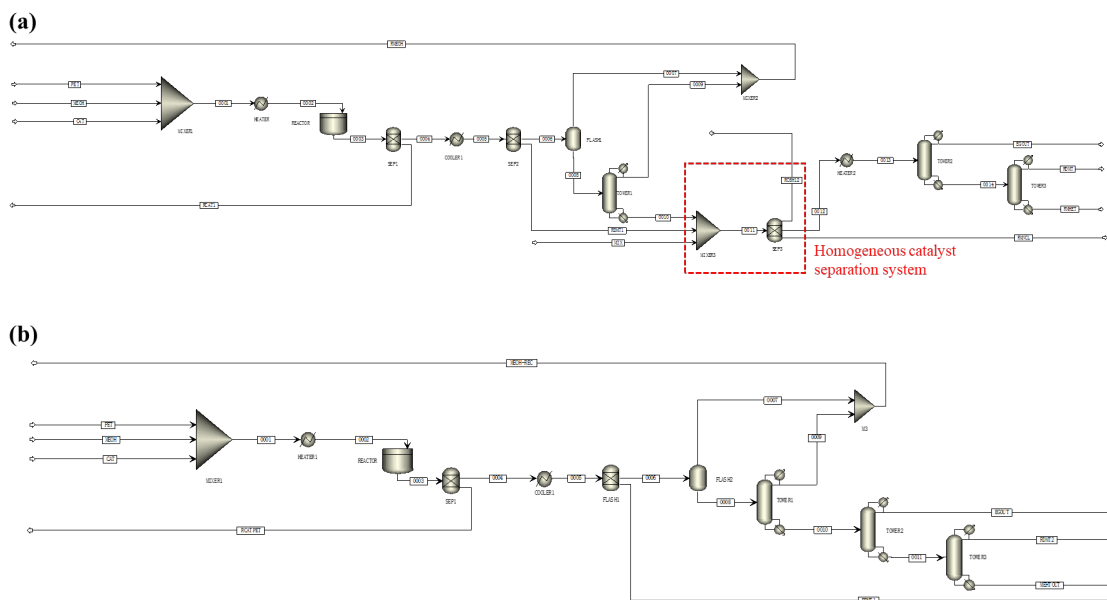

**Figure. S28.** Process simulation of PET methanolysis through (a) synergistic system and (b) heterogeneous system by Aspen Plus .

*Note:* The Aspen Plus simulation utilized a set of property databases including APV140 ASPENPCD, APV140 AQUEOUS, APV140 SOLIDS, APV140 INORGANIC, APESV140 AP-EOS, NISTV140 NIST-TRC, APV140 POLYMER, and APV140 PURE40. The NRTL model was employed as the primary property method for handling the mixed organic system. For the homogeneous manganese salt section, the ELECNRTL method was applied to establish the necessary binary interaction parameters. Utility analysis was performed using the built-in utility module within Aspen Plus V14.

Process :As illustrated in Fig. S28a, the process flow for the synergistic system can be summarized as follows: First, PET particles, catalysts, and methanol are thoroughly mixed in Mixer 1 (MIXER-1). The mixture is preheated (HEATER-1) and then fed into a stirred batch reactor (REACTOR) for methanolysis. The post-reaction stream undergoes a preliminary separation at elevated temperature to recover the heterogeneous  $Mn_2O_3$  catalyst. It is then cooled in Cooler 1 (COOLER-1) to crystallize and recover a portion of the DMT product (which carries some  $MnCl_2$ ). The remaining liquid stream enters a flash drum (FLASH-1) to separate the majority of the methanol, followed by Distillation Column

1 (TOWER-1) to recover the remaining methanol overhead. The bottom product from TOWER-1, a mixture of DMT, byproducts, and a small amount of methanol, is combined with the crystallized DMT and fed into the homogeneous catalyst separation system to recover  $\text{MnCl}_2$  (the outlet flow rate is derived from a separate Aspen process). The separated organic phase is then preheated and sent to Distillation Column 2 (TOWER-2), where ethylene glycol (EG) is recovered as the overhead product. The bottom stream from TOWER-2 enters Distillation Column 3 (TOWER-3) for final separation, yielding high-purity (99.99%) dimethyl terephthalate (DMT) and industrial-grade (91.96%) mono(2-hydroxyethyl) terephthalate (MHET) as products. For the heterogeneous-only system, the process omits the homogeneous catalyst separation unit, while the rest of the flow sheets remain consistent with the description above, the mass balance table of each stream of the two processes has been listed in Table S18-22.

Within the homogeneous catalyst separation system, a mixed solution of water and cyclohexane (mass ratio of 2:3) at a total flow rate of 10,000 kg/h was introduced for washing and phase separation. The final aqueous phase contained the  $\text{MnCl}_2$  solution for recovery, while the organic phase, comprising cyclohexane mixed with the main and by-products, was directed to the subsequent separation processes.

## Part 2 Supplementary Tables

**Table. S1.** Conversion of PET and yield of products (170 °C-10wt%-1h).

| Catalysts Category                 | Conversion of PET | Yield (normalization method) |        |       | Yield (internal standard method) |        |       | Yield EG |        |
|------------------------------------|-------------------|------------------------------|--------|-------|----------------------------------|--------|-------|----------|--------|
|                                    |                   | DMT                          | MHET   | BHET  | DMT                              | MHET   | BHET  |          |        |
| <b>MnO</b>                         | <b>i</b>          | 11.43%                       | 8.09%  | 2.14% | 1.20%                            | 6.37%  | 1.69% | 0.94%    | 2.93%  |
| <b>MnO</b>                         | <b>ii</b>         | 71.67%                       | 64.01% | 5.13% | 2.53%                            | 60.03% | 4.81% | 2.37%    | 51.36% |
| <b>Mn<sub>3</sub>O<sub>4</sub></b> | <b>i</b>          | 5.92%                        | 5.92%  | 0.31% | 0.19%                            | 5.29%  | 0.31% | 0.18%    | 4.09%  |
| <b>Mn<sub>3</sub>O<sub>4</sub></b> | <b>ii</b>         | 51.02%                       | 46.30% | 3.09% | 1.63%                            | 41.30% | 2.76% | 1.45%    | 35.08% |
| <b>Mn<sub>2</sub>O<sub>3</sub></b> | <b>i</b>          | 1.50%                        | 1.13%  | 0.22% | 0.15%                            | 1.10%  | 0.21% | 0.15%    | 1.13%  |
| <b>Mn<sub>2</sub>O<sub>3</sub></b> | <b>ii</b>         | 18.68%                       | 11.15% | 6.61% | 0.91%                            | 10.33% | 6.13% | 0.84%    | 2.84%  |
| <b>MnO<sub>2</sub></b>             | <b>i</b>          | 13.78%                       | 10.23% | 2.46% | 1.09%                            | 8.52%  | 2.05% | 0.91%    | 4.66%  |
| <b>MnO<sub>2</sub></b>             | <b>ii</b>         | 73.37%                       | 66.84% | 1.96% | 4.57%                            | 59.33% | 1.74% | 4.05%    | 48.71% |

*Note:* Supplementary Tables S1-7 present the raw data for the conversion of PET methanolysis and the corresponding product yields, calculated based on the normalization method and internal standard method. In Table. S1 and Table. S2, 'i' represents the individual oxide system, while 'ii' represents the synergistic system. The total catalyst mass is 10% of the PET mass.

**Table. S2.** Conversion of PET and yield of products (180 °C-10wt%-1h).

| Catalysts                          | Category  | Conversion of PET | Yield (normalization method) |        |       | Yield (internal standard method) |        |       | Yield  |
|------------------------------------|-----------|-------------------|------------------------------|--------|-------|----------------------------------|--------|-------|--------|
|                                    |           |                   | DMT                          | MHET   | BHET  | DMT                              | MHET   | BHET  | EG     |
| <b>MnO</b>                         | <b>i</b>  | 76.01%            | 54.70%                       | 19.39% | 1.92% | 49.34%                           | 17.49% | 1.73% | 28.33% |
| <b>MnO</b>                         | <b>ii</b> | 100.00%           | 95.00%                       | 1.90%  | 3.10% | 93.40%                           | 1.87%  | 3.05% | 86.39% |
| <b>Mn<sub>3</sub>O<sub>4</sub></b> | <b>i</b>  | 9.49%             | 4.63%                        | 4.03%  | 0.82% | 4.11%                            | 3.58%  | 0.73% | 1.67%  |
| <b>Mn<sub>3</sub>O<sub>4</sub></b> | <b>ii</b> | 100.00%           | 96.47%                       | 1.29%  | 2.24% | 93.38%                           | 1.25%  | 2.17% | 88.97% |
| <b>Mn<sub>2</sub>O<sub>3</sub></b> | <b>i</b>  | 8.79%             | 4.20%                        | 4.59%  | 0.00% | 3.85%                            | 4.21%  | 0.00% | 2.28%  |
| <b>Mn<sub>2</sub>O<sub>3</sub></b> | <b>ii</b> | 100.00%           | 95.35%                       | 1.75%  | 2.90% | 93.97%                           | 1.73%  | 2.86% | 85.72% |
| <b>MnO<sub>2</sub></b>             | <b>i</b>  | 89.55%            | 80.12%                       | 6.34%  | 3.08% | 76.86%                           | 6.08%  | 2.96% | 66.87% |
| <b>MnO<sub>2</sub></b>             | <b>ii</b> | 100.00%           | 95.23%                       | 1.83%  | 2.94% | 94.06%                           | 1.81%  | 2.91% | 89.17% |

*Note:* The total catalyst mass is 10% of the PET mass.

**Table. S3.** Conversion of PET and yield of products at different times at 170 °C.

| Time (h)   | Conversion of PET | Yield (normalization method) |       |       | Yield (internal standard method) |       |       | Yield EG |
|------------|-------------------|------------------------------|-------|-------|----------------------------------|-------|-------|----------|
|            |                   | DMT                          | MHET  | BHET  | DMT                              | MHET  | BHET  |          |
| <b>0.5</b> | 3.60%             | 2.82%                        | 0.58% | 0.20% | 2.17%                            | 0.45% | 0.15% | 1.72%    |
| <b>1</b>   | 18.68%            | 11.15%                       | 6.61% | 0.91% | 10.33%                           | 6.13% | 0.84% | 2.84%    |
| <b>2</b>   | 56.90%            | 46.13%                       | 7.48% | 3.30% | 42.68%                           | 6.92% | 3.05% | 31.47%   |
| <b>3</b>   | 82.16%            | 78.64%                       | 2.03% | 1.48% | 74.94%                           | 1.94% | 1.41% | 69.82%   |
| <b>4</b>   | 99.98%            | 96.53%                       | 1.23% | 2.22% | 92.95%                           | 1.18% | 2.14% | 89.17%   |
| <b>6</b>   | 100.00%           | 96.60%                       | 1.11% | 2.29% | 94.88%                           | 1.09% | 2.25% | 90.03%   |

*Note:* The total catalyst mass is 10% of the PET mass.

**Table. S4.** Conversion of PET and yield of products at different mass ratios  
(MnCl<sub>2</sub>·4H<sub>2</sub>O: Mn<sub>2</sub>O<sub>3</sub>) at 170 °C.

| Ratio       | Conversion of PET | Yield (normalization method) |       |       | Yield (internal standard method) |       |       | Yield EG |
|-------------|-------------------|------------------------------|-------|-------|----------------------------------|-------|-------|----------|
|             |                   | DMT                          | MHET  | BHET  | DMT                              | MHET  | BHET  |          |
| <b>1:36</b> | 3.51%             | 1.39%                        | 1.31% | 0.81% | 1.06%                            | 1.00% | 0.62% | 0        |
| <b>1:18</b> | 5.89%             | 2.19%                        | 2.12% | 1.58% | 1.97%                            | 1.92% | 1.43% | 0        |
| <b>1:9</b>  | 18.68%            | 11.15%                       | 6.61% | 0.91% | 10.33%                           | 6.13% | 0.84% | 2.84%    |
| <b>1:4</b>  | 40.11%            | 30.62%                       | 7.27% | 2.22% | 26.76%                           | 6.36% | 1.94% | 18.53%   |
| <b>1:1</b>  | 34.84%            | 28.30%                       | 4.08% | 2.46% | 26.15%                           | 3.77% | 2.28% | 19.21%   |
| <b>4:1</b>  | 31.81%            | 26.90%                       | 3.42% | 1.48% | 23.58%                           | 3.00% | 1.30% | 17.83%   |
| <b>1</b>    | 30.62%            | 21.63%                       | 4.59% | 4.40% | 18.44%                           | 3.91% | 3.75% | 7.52%    |

*Note:* The total catalyst mass is 10% of the PET mass.

**Table. S5.** Conversion of PET and yield of products at different temperatures when MnCl<sub>2</sub>·4H<sub>2</sub>O used alone.

| Temperature (°C) | Dosage | Conversion of PET | Yield (normalization method) |        |       | Yield (internal standard method) |        |       | Yield EG |
|------------------|--------|-------------------|------------------------------|--------|-------|----------------------------------|--------|-------|----------|
|                  |        |                   | DMT                          | MHET   | BHET  | DMT                              | MHET   | BHET  |          |
| 170              | 1%     | 13.96%            | 8.17%                        | 3.81%  | 1.98% | 4.26%                            | 1.99%  | 1.03% | 1.22%    |
|                  | 10%    | 30.62%            | 21.63%                       | 4.59%  | 4.40% | 18.44%                           | 3.91%  | 3.75% | 7.52%    |
| 180              | 1%     | 58.02%            | 32.71%                       | 21.24% | 4.07% | 28.85%                           | 18.74% | 3.59% | 5.94%    |
|                  | 10%    | 100.00%           | 65.54%                       | 24.59% | 9.87% | 60.71%                           | 22.78% | 9.14% | 28.65%   |

*Note:* The reaction time is 1 hour.

**Table. S6.** Conversion of PET and product yields over repeated catalyst recycling.

| Cycle method                                                                            | Cycle times | Conversion of PET | Yield (normalization method) |       |       | Yield (internal standard method) |       |       | Yield EG |
|-----------------------------------------------------------------------------------------|-------------|-------------------|------------------------------|-------|-------|----------------------------------|-------|-------|----------|
|                                                                                         |             |                   | DMT                          | MHET  | BHET  | DMT                              | MHET  | BHET  |          |
| Semi-supplementation strategy                                                           | C1          | 73.37%            | 68.39%                       | 2.35% | 2.63% | 66.36%                           | 2.28% | 2.55% | 59.98%   |
|                                                                                         | C2          | 70.42%            | 68.38%                       | 1.36% | 0.68% | 65.27%                           | 1.30% | 0.65% | 62.47%   |
|                                                                                         | C3          | 67.36%            | 65.37%                       | 1.86% | 0.13% | 63.97%                           | 1.82% | 0.13% | 60.76%   |
|                                                                                         | C4          | 73.25%            | 70.39%                       | 2.12% | 0.74% | 67.57%                           | 2.04% | 0.71% | 63.17%   |
|                                                                                         | C5          | 69.85%            | 66.48%                       | 3.14% | 0.23% | 62.17%                           | 2.94% | 0.22% | 58.83%   |
| Recycled Mn <sub>2</sub> O <sub>3</sub> + fresh MnCl <sub>2</sub> ·4H <sub>2</sub> O    | C1          | 97.26%            | 93.64%                       | 2.35% | 1.27% | 90.83%                           | 2.28% | 1.23% | 87.21%   |
|                                                                                         | C2          | 98.12%            | 91.33%                       | 3.98% | 2.81% | 88.15%                           | 3.84% | 2.71% | 79.36%   |
|                                                                                         | C3          | 96.85%            | 92.66%                       | 2.33% | 1.86% | 87.24%                           | 2.20% | 1.75% | 76.25%   |
| Recycled Mn <sub>2</sub> O <sub>3</sub> + recycled MnCl <sub>2</sub> ·4H <sub>2</sub> O | C1          | 74.46%            | 68.25%                       | 3.88% | 2.33% | 68.44%                           | 3.89% | 2.34% | 53.34%   |
|                                                                                         | C2          | 68.51%            | 63.33%                       | 4.15% | 1.03% | 58.62%                           | 3.84% | 0.95% | 49.82%   |
|                                                                                         | C3          | 61.32%            | 54.27%                       | 4.76% | 2.29% | 52.36%                           | 4.59% | 2.21% | 46.73%   |

*Note:* The reaction time is 1 hour and the total catalyst mass is 10% of the PET mass. The method of catalyst recycling by “semi-supplementation” is shown in note of Fig. S5.

**Table. S7.** Conversion of commercial PET and yield of products at 180 °C for 1 hour.

| Category             | Conversion of PET | Yield (Normalization Method) |       |       | Yield (internal standard method) |       |       | Yield  |
|----------------------|-------------------|------------------------------|-------|-------|----------------------------------|-------|-------|--------|
|                      |                   | DMT                          | MHET  | BHET  | DMT                              | MHET  | BHET  | EG     |
| <b>Nongfu Spring</b> | 100.00%           | 97.38%                       | 2.06% | 0.56% | 96.32%                           | 2.04% | 0.55% | 93.07% |
| <b>Coca-Cola</b>     | 98.09%            | 94.89%                       | 2.79% | 0.41% | 92.21%                           | 2.71% | 0.39% | 89.36% |
| <b>Sprite</b>        | 97.45%            | 94.96%                       | 1.06% | 1.43% | 94.25%                           | 1.05% | 1.42% | 91.45% |
| <b>Mizone</b>        | 99.59%            | 95.98%                       | 3.08% | 0.53% | 93.13%                           | 2.99% | 0.52% | 89.61% |

*Note:* The total catalyst mass is 10% ( $\text{MnCl}_2 \cdot 4\text{H}_2\text{O}$ :  $\text{Mn}_2\text{O}_3=1:9$ ) of the PET mass.

**Table. S8.** Conversion of PET and yield of products with different volumes of methanol at 180 °C for 1 hour.

| MeOH (mL) | Conversion of PET | Yield (Normalization Method) |       |       | Yield (internal standard method) |       |       | Yield  |
|-----------|-------------------|------------------------------|-------|-------|----------------------------------|-------|-------|--------|
|           |                   | DMT                          | MHET  | BHET  | DMT                              | MHET  | BHET  | EG     |
| <b>10</b> | 91.64%            | 84.38%                       | 6.53% | 0.73% | 81.72%                           | 6.32% | 0.71% | 69.06% |
| <b>20</b> | 97.61%            | 94.32%                       | 2.34% | 0.95% | 91.61%                           | 2.02% | 0.92% | 87.10% |
| <b>40</b> | 100.00%           | 95.35%                       | 1.75% | 2.90% | 93.97%                           | 1.73% | 2.86% | 85.27% |
| <b>80</b> | 88.63%            | 85.37%                       | 2.80% | 0.46% | 83.76%                           | 2.75% | 0.45% | 81.34% |

*Note:* The method of different volumes loading is shown in note of Fig. S6.

**Table. S9.** Conversion of PET and yield of products with different catalyst loading at 180 °C for 1 hour.

| <b>Catalyst loading</b> | <b>Conversion of PET</b> | <b>Yield (Normalization Method)</b> |             |             | <b>Yield (internal standard method)</b> |             |             | <b>Yield</b> |
|-------------------------|--------------------------|-------------------------------------|-------------|-------------|-----------------------------------------|-------------|-------------|--------------|
|                         |                          | <b>DMT</b>                          | <b>MHET</b> | <b>BHET</b> | <b>DMT</b>                              | <b>MHET</b> | <b>BHET</b> | <b>EG</b>    |
| <b>1%</b>               | 49.42%                   | 40.98%                              | 7.13%       | 1.31%       | 39.14%                                  | 6.81%       | 1.25%       | 28.99%       |
| <b>2.5%</b>             | 76.14%                   | 66.93%                              | 6.45%       | 2.76%       | 65.83%                                  | 6.34%       | 2.71%       | 56.08%       |
| <b>5%</b>               | 94.28%                   | 89.63%                              | 3.55%       | 1.10%       | 89.11%                                  | 3.53%       | 1.09%       | 82.15%       |
| <b>10%</b>              | 100.00%                  | 95.35%                              | 1.75%       | 2.90%       | 93.97%                                  | 1.73%       | 2.86%       | 85.27%       |

**Table. S10.** Conversion of PET and yield of products with heterogeneous ('i') and synergistic ('ii') system for oxidation with other transition metals.

| Metal oxide                        | Category  | Conversion of PET | Yield (normalization method) |        |       | Yield (internal standard method) |        |       | Yield EG |
|------------------------------------|-----------|-------------------|------------------------------|--------|-------|----------------------------------|--------|-------|----------|
|                                    |           |                   | DMT                          | MHET   | BHET  | DMT                              | MHET   | BHET  |          |
| <b>Fe<sub>2</sub>O<sub>3</sub></b> | <b>i</b>  | 10.71%            | 4.39%                        | 5.31%  | 1.01% | 4.04%                            | 4.89%  | 0.93% | 1.33%    |
|                                    | <b>ii</b> | 100.00%           | 93.38%                       | 4.15%  | 2.47% | 90.24%                           | 4.01%  | 2.39% | 83.64%   |
| <b>Co<sub>2</sub>O<sub>3</sub></b> | <b>i</b>  | 59.36%            | 32.14%                       | 24.31% | 2.91% | 30.65%                           | 23.18% | 2.78% | 18.11%   |
|                                    | <b>ii</b> | 97.89%            | 92.88%                       | 3.51%  | 1.50% | 88.92%                           | 3.36%  | 1.44% | 85.83%   |
| <b>Ni<sub>2</sub>O<sub>3</sub></b> | <b>i</b>  | 8.31%             | 3.89%                        | 3.97%  | 0.45% | 3.14%                            | 3.20%  | 0.36% | 1.06%    |
|                                    | <b>ii</b> | 99.39%            | 94.47%                       | 3.10%  | 1.76% | 90.66%                           | 2.97%  | 1.69% | 80.46%   |

**Table. S11.** Residual metal content in the solution catalyzed by metal oxides

| <b>Metal oxide</b>                 | <b>Residual amount of metal in solution<br/>(mg/L)</b> |
|------------------------------------|--------------------------------------------------------|
| <b>Fe<sub>2</sub>O<sub>3</sub></b> | Not detected                                           |
| <b>Co<sub>2</sub>O<sub>3</sub></b> | 5.42                                                   |
| <b>Ni<sub>2</sub>O<sub>3</sub></b> | 1.61                                                   |

*Note:* The measuring elements were Fe, Co, and Ni, respectively.

**Table. S12.** Residual manganese content in the product before and after washing

| <b>Mass ratio of<br/>MnCl<sub>2</sub>·4H<sub>2</sub>O: Mn<sub>2</sub>O<sub>3</sub></b> | <b>Washing time</b> | <b>Residual manganese<br/>(mg/kg)</b> |
|----------------------------------------------------------------------------------------|---------------------|---------------------------------------|
| <b>1:9</b>                                                                             | 0                   | 2790                                  |
|                                                                                        | 3                   | 70.1                                  |
|                                                                                        | 5                   | 29.5                                  |
|                                                                                        | 10                  | 27.2                                  |
| <b>1:4</b>                                                                             | 0                   | 20900                                 |
|                                                                                        | 3                   | 369                                   |
|                                                                                        | 5                   | 270                                   |
|                                                                                        | 10                  | 189                                   |

*Note:* The product listed in the table is obtained at 180 °C for 1 hour. As can be seen from the table, when the number of water washing cycles increased to 10, the removal rate of residual manganese reached approximately 99% for all mass ratios of MnCl<sub>2</sub>·4H<sub>2</sub>O to Mn<sub>2</sub>O<sub>3</sub>. This confirms that excessive homogeneous MnCl<sub>2</sub>·4H<sub>2</sub>O will inevitably impair the final product purity.

**Table. S13.** Ratio of  $\text{MnCl}_2 \cdot 4\text{H}_2\text{O}$  in different catalytic systems (comparison of mass and molar ratio), with 10wt% total catalyst of PET.

| <b>Catalyst system</b>                                                              | <b>Mass ratio (<math>\text{MnCl}_2 \cdot 4\text{H}_2\text{O} : \text{MnO}_x</math>)</b> | <b>Molar ratio</b> |
|-------------------------------------------------------------------------------------|-----------------------------------------------------------------------------------------|--------------------|
| $\text{MnO} + \text{MnCl}_2 \cdot 4\text{H}_2\text{O}$                              | 1 : 9                                                                                   | 1 : 17.2           |
| $\text{Mn}_3\text{O}_4 + \text{MnCl}_2 \cdot 4\text{H}_2\text{O}$                   | 1 : 9                                                                                   | 1 : 14.8           |
| <b><math>\text{Mn}_2\text{O}_3 + \text{MnCl}_2 \cdot 4\text{H}_2\text{O}</math></b> | <b>1 : 9</b>                                                                            | <b>1 : 11.3</b>    |
| $\text{MnO}_2 + \text{MnCl}_2 \cdot 4\text{H}_2\text{O}$                            | 1 : 9                                                                                   | 1 : 20.5           |

**Table. S14.** MnO XPS spectral fitting.

|            | <b>Peak Name</b>    | <b>Peak position</b> | <b>Height (CPS)</b> | <b>Area CPS.eV</b> | <b>FWHM (eV)</b> |      |
|------------|---------------------|----------------------|---------------------|--------------------|------------------|------|
| <b>i</b>   | <b>2p 3/2</b>       | 641.56               | 10744.17            | 35138.70           | 3.14             |      |
|            | <b>Mn 2p 2p 1/2</b> | 653.68               | 5064.36             | 16886.36           | 3.20             |      |
|            | <b>satellite</b>    | 645.98               | 984.78              | 2729.49            | 2.66             |      |
|            | <b>Mn 3s</b>        |                      | 83.31               | 1183.44            | 3784.80          | 3.07 |
|            |                     |                      | 89.30               | 661.72             | 2854.52          | 4.14 |
|            |                     |                      |                     |                    |                  |      |
| <b>ii</b>  | <b>2p 3/2</b>       | 641.24               | 23003.69            | 79697.18           | 3.32             |      |
|            | <b>Mn 2p 2p1/2</b>  | 653.08               | 10520.20            | 34420.16           | 3.14             |      |
|            | <b>satellite</b>    | 646.06               | 1553.49             | 4241.04            | 2.62             |      |
|            | <b>Mn 3s</b>        |                      | 83.33               | 1920.56            | 6048.39          | 3.02 |
|            |                     |                      | 89.17               | 1224.68            | 3879.33          | 3.04 |
|            |                     |                      |                     |                    |                  |      |
| <b>iii</b> | <b>2p 3/2</b>       | 641.19               | 30776.28            | 96865.06           | 2.91             |      |
|            | <b>Mn 2p 2p1/2</b>  | 652.93               | 13687.63            | 47545.68           | 2.99             |      |
|            | <b>satellite</b>    | 644.42               | 4661.08             | 20263.23           | 3.50             |      |
|            | <b>Mn 3s</b>        |                      | 82.96               | 2618.06            | 8882.43          | 3.05 |
|            |                     |                      | 88.72               | 1288.89            | 4731.10          | 3.50 |
|            |                     |                      |                     |                    |                  |      |

*Note:* Table S14-17 provide the raw XPS fitting data for manganese, with the corresponding fitting methodology detailed in Fig. S19. Here, ‘i’ represents the original catalyst, ‘ii’ represents the catalyst after heterogeneous system reaction, and ‘iii’ represents the catalyst after synergistic reaction, the same of Table S15-17.

**Table. S15.** Mn<sub>3</sub>O<sub>4</sub> XPS spectral fitting.

|            | <b>Peak Name</b> | <b>Peak position</b> | <b>Height (CPS)</b> | <b>Area CPS.eV</b> | <b>FWHM (eV)</b> |      |
|------------|------------------|----------------------|---------------------|--------------------|------------------|------|
| <b>i</b>   | <b>Mn 2p</b>     | <b>2p 3/2</b>        | 641.51              | 25915.99           | 86299.17         | 3.20 |
|            |                  | <b>2p 1/2</b>        | 653.50              | 12103.27           | 40861.03         | 3.24 |
|            |                  | <b>satellite</b>     | 646.15              | 2162.37            | 6241.27          | 2.77 |
|            | <b>Mn 3s</b>     |                      | 83.36               | 2261.67            | 6949.20          | 2.95 |
|            |                  |                      | 88.98               | 1474.79            | 3657.38          | 2.38 |
| <b>ii</b>  | <b>Mn 2p</b>     | <b>2p 3/2</b>        | 641.39              | 26552.31           | 96384.61         | 3.48 |
|            |                  | <b>2p 1/2</b>        | 653.07              | 12199.04           | 42958.67         | 3.38 |
|            |                  | <b>satellite</b>     | 646.02              | 2337.60            | 8695.63          | 3.57 |
|            | <b>Mn 3s</b>     |                      | 83.46               | 2119.25            | 9654.80          | 3.14 |
|            |                  |                      | 89.06               | 911.35             | 3398.49          | 3.48 |
| <b>iii</b> | <b>Mn 2p</b>     | <b>2p 3/2</b>        | 641.26              | 156214.63          | 472814.34        | 2.90 |
|            |                  | <b>2p 1/2</b>        | 653.01              | 74595.13           | 251497.31        | 3.03 |
|            |                  | <b>satellite</b>     | 644.05              | 35471.69           | 144178.15        | 3.50 |
|            | <b>Mn 3s</b>     |                      | 83.23               | 2058.06            | 7799.77          | 3.50 |
|            |                  |                      | 88.82               | 1117.09            | 4232.29          | 3.50 |

**Table. S16.** Mn<sub>2</sub>O<sub>3</sub> XPS spectral fitting.

|            | <b>Peak Name</b> | <b>Peak position</b> | <b>Height (CPS)</b> | <b>Area CPS.eV</b> | <b>FWHM (eV)</b> |      |
|------------|------------------|----------------------|---------------------|--------------------|------------------|------|
| <b>i</b>   | <b>Mn 2p</b>     | <b>2p 3/2</b>        | 653.55              | 28039.62           | 104082.11        | 3.36 |
|            |                  | <b>2p 1/2</b>        | 641.69              | 55488.23           | 201282.28        | 2.32 |
|            | <b>Mn 3s</b>     |                      | 83.46               | 4105.35            | 14800.84         | 2.16 |
|            |                  |                      | 88.99               | 1915.05            | 8131.77          | 2.38 |
| <b>ii</b>  | <b>Mn 2p</b>     | <b>2p 3/2</b>        | 641.21              | 3609.67            | 14524.40         | 2.36 |
|            |                  | <b>2p 1/2</b>        | 653.24              | 1758.82            | 6863.39          | 3.50 |
|            | <b>Mn 3s</b>     |                      | 83.70               | 321.60             | 1218.81          | 3.50 |
|            |                  |                      | 89.21               | 180.87             | 685.39           | 3.50 |
| <b>iii</b> | <b>Mn 2p</b>     | <b>2p 3/2</b>        | 641.11              | 23511.24           | 88897.53         | 2.23 |
|            |                  | <b>2p 1/2</b>        | 653.07              | 11470.71           | 43668.03         | 3.45 |
|            | <b>Mn 3s</b>     |                      | 83.61               | 1920.16            | 6873.74          | 2.73 |
|            |                  |                      | 89.14               | 888.35             | 3712.89          | 3.50 |

**Table. S17.** MnO<sub>2</sub> XPS spectral fitting.

|            | <b>Peak Name</b> | <b>Peak position</b> | <b>Height (CPS)</b> | <b>Area CPS.eV</b> | <b>FWHM (eV)</b> |      |
|------------|------------------|----------------------|---------------------|--------------------|------------------|------|
| <b>i</b>   | <b>Mn 2p</b>     | <b>2p 3/2</b>        | 642.61              | 88581.21           | 211518.40        | 2.67 |
|            |                  | <b>2p 1/2</b>        | 654.05              | 68621.66           | 105759.20        | 2.67 |
|            | <b>Mn 3s</b>     |                      | 84.54               | 9740.60            | 12500.74         | 3.17 |
|            |                  |                      | 89.11               | 8130.03            | 5736.50          | 3.17 |
| <b>ii</b>  |                  | <b>2p 3/2</b>        | 641.58              | 72430.73           | 176518.40        | 3.39 |
|            | <b>Mn 2p</b>     | <b>2p 1/2</b>        | 653.22              | 58003.95           | 88259.20         | 3.38 |
|            |                  | <b>satellite</b>     | 645.20              | 37502.73           | 26333.60         | 3.38 |
|            | <b>Mn 3s</b>     |                      | 83.48               | 8975.51            | 13652.78         | 3.72 |
|            |                  |                      | 89.27               | 7855.78            | 8055.56          | 3.71 |
| <b>iii</b> |                  | <b>2p 3/2</b>        | 641.55              | 169440.93          | 537000.53        | 2.98 |
|            | <b>Mn 2p</b>     | <b>2p 1/2</b>        | 653.10              | 80686.16           | 296747.26        | 3.09 |
|            |                  | <b>satellite</b>     | 645.15              | 27798.69           | 120526.42        | 4.12 |
|            | <b>Mn 3s</b>     |                      | 83.32               | 12960.36           | 42967.14         | 2.98 |
|            |                  |                      | 89.10               | 6976.52            | 29155.83         | 3.50 |

**Table. S18.** Mass balance of PET methanolysis in synergistic system.

| <b>Stream</b>            | <b>CAT</b> | <b>MEOH</b> | <b>PET</b> | <b>0001</b> | <b>0002</b> | <b>0003</b> | <b>0004</b> | <b>0005</b> |
|--------------------------|------------|-------------|------------|-------------|-------------|-------------|-------------|-------------|
| <b>Temperature (°C)</b>  | 25.0       | 25.0        | 25.0       | 25.1        | 180.0       | 180.0       | 180.0       | 30.0        |
| <b>Pressure (bar)</b>    | 1.0        | 1.0         | 1.0        | 1.0         | 30.0        | 30.0        | 30.0        | 1.0         |
| <b>Mass flow (kg/hr)</b> | 2000.00    | 300000.00   | 20000.00   | 322000.00   | 322000.00   | 322048.69   | 320248.69   | 320248.69   |
| <b>PET</b>               | 0.00       | 0.00        | 20000.00   | 20000.00    | 20000.00    | 0.00        | 0.00        | 0.00        |
| <b>CH3OH</b>             | 0.00       | 300000.00   | 0.00       | 300000.00   | 300000.00   | 293433.62   | 293433.62   | 293433.62   |
| <b>MN2O3</b>             | 1800.00    | 0.00        | 0.00       | 1800.00     | 1800.00     | 1800.00     | 0.00        | 0.00        |
| <b>EG</b>                | 0.00       | 0.00        | 0.00       | 0.00        | 0.00        | 6244.21     | 6244.21     | 6244.21     |
| <b>BHET</b>              | 0.00       | 0.00        | 0.00       | 0.00        | 0.00        | 29.50       | 29.50       | 29.50       |
| <b>MHET</b>              | 0.00       | 0.00        | 0.00       | 0.00        | 0.00        | 783.21      | 783.21      | 783.21      |
| <b>DMT</b>               | 0.00       | 0.00        | 0.00       | 0.00        | 0.00        | 19558.15    | 19558.15    | 19558.15    |
| <b>MNCL2</b>             | 200.00     | 0.00        | 0.00       | 0.00        | 0.00        | 0.00        | 0.00        | 0.00        |
| <b>WATER</b>             | 0.00       | 0.00        | 0.00       | 0.00        | 0.00        | 0.00        | 0.00        | 0.00        |
| <b>C6H12</b>             | 0.00       | 0.00        | 0.00       | 0.00        | 0.00        | 0.00        | 0.00        | 0.00        |
| <b>Mn<sup>2+</sup></b>   | 0.00       | 0.00        | 0.00       | 87.31       | 87.31       | 87.31       | 87.31       | 87.31       |
| <b>Cl<sup>-</sup></b>    | 0.00       | 0.00        | 0.00       | 112.69      | 112.69      | 112.69      | 112.69      | 112.69      |

**Table. S19.** Mass balance of PET methanolysis in synergistic system (continued).

| <b>Stream</b>            | <b>0006</b> | <b>0007</b> | <b>0008</b> | <b>0009</b> | <b>0010</b> | <b>0010</b> | <b>0011</b> | <b>0012</b> | <b>0013</b> | <b>0014</b> |
|--------------------------|-------------|-------------|-------------|-------------|-------------|-------------|-------------|-------------|-------------|-------------|
| <b>Temperature (°C)</b>  | 30.0        | 70.0        | 70.0        | 58.9        | 208.7       | 208.7       | 86.2        | 86.2        | 200.0       | 302.3       |
| <b>Pressure (bar)</b>    | 1.0         | 0.8         | 0.8         | 0.8         | 1.2         | 1.2         | 1.0         | 1.0         | 1.0         | 1.5         |
| <b>Mass flow (kg/hr)</b> | 305380.08   | 291392.68   | 13987.40    | 2922.10     | 11065.30    | 11065.30    | 35933.91    | 25734.82    | 25734.82    | 20300.77    |
| <b>PET</b>               | 0.00        | 0.00        | 0.00        | 0.00        | 0.00        | 0.00        | 0.00        | 0.00        | 0.00        | 0.00        |
| <b>CH3OH</b>             | 293433.62   | 290511.11   | 2922.51     | 2916.66     | 5.85        | 5.85        | 5.85        | 0.00        | 0.00        | 0.00        |
| <b>MN2O3</b>             | 0.00        | 0.00        | 0.00        | 0.00        | 0.00        | 0.00        | 0.00        | 0.00        | 0.00        | 0.00        |
| <b>EG</b>                | 6244.21     | 812.89      | 5431.32     | 5.43        | 5425.89     | 5425.89     | 5425.89     | 5424.64     | 5424.64     | 0.54        |
| <b>BHET</b>              | 29.50       | 0.00        | 29.50       | 0.00        | 29.50       | 29.50       | 29.50       | 29.50       | 29.50       | 29.50       |
| <b>MHET</b>              | 783.21      | 0.04        | 783.17      | 0.00        | 783.17      | 783.17      | 783.17      | 783.17      | 783.17      | 783.17      |
| <b>DMT</b>               | 4889.54     | 68.64       | 4820.90     | 0.00        | 4820.90     | 4820.90     | 19489.51    | 19489.51    | 19489.51    | 19487.56    |
| <b>MNCL2</b>             | 0.00        | 0.00        | 0.00        | 0.00        | 0.00        | 0.00        | 0.00        | 0.00        | 0.00        | 0.00        |
| <b>WATER</b>             | 0.00        | 0.00        | 0.00        | 0.00        | 0.00        | 0.00        | 4000.00     | 5.00        | 5.00        | 0.00        |
| <b>C6H12</b>             | 0.00        | 0.00        | 0.00        | 0.00        | 0.00        | 0.00        | 6000.00     | 3.00        | 3.00        | 0.00        |
| <b>Mn<sup>2+</sup></b>   | 0.00        | 0.00        | 0.00        | 0.00        | 0.00        | 0.00        | 87.31       | 0.00        | 0.00        | 0.00        |
| <b>Cl<sup>-</sup></b>    | 0.00        | 0.00        | 0.00        | 0.00        | 0.00        | 0.00        | 112.69      | 0.00        | 0.00        | 0.00        |

**Table. S20.** Mass balance of PET methanolysis in synergistic system (continued).

| <b>Stream</b>            | <b>RC6H12</b> | <b>MIX</b> | <b>EGOUT</b> | <b>RCAT1</b> | <b>RDMT</b> | <b>RDMT1</b> | <b>RMEOH</b> | <b>RMHET</b> | <b>RMNCL</b> |
|--------------------------|---------------|------------|--------------|--------------|-------------|--------------|--------------|--------------|--------------|
| <b>Temperature (°C)</b>  | 86.2          | 25.0       | 198.2        | 180.0        | 290.3       | 30.0         | 63.7         | 336.5        | 86.2         |
| <b>Pressure (bar)</b>    | 1.0           | 1.0        | 1.2          | 30.0         | 1.2         | 1.0          | 0.8          | 1.5          | 1.0          |
| <b>Mass flow (kg/hr)</b> | 5996.10       | 10000.00   | 5434.05      | 1800.00      | 19449.21    | 14868.61     | 294314.78    | 851.57       | 4202.99      |
| <b>PET</b>               | 0.00          | 0.00       | 0.00         | 0.00         | 0.00        | 0.00         | 0.00         | 0.00         | 0.00         |
| <b>CH3OH</b>             | 0.05          | 0.00       | 0.00         | 0.00         | 0.00        | 0.00         | 293427.78    | 0.00         | 5.80         |
| <b>MN2O3</b>             | 0.00          | 0.00       | 0.00         | 1800.00      | 0.00        | 0.00         | 0.00         | 0.00         | 0.00         |
| <b>EG</b>                | 0.05          | 0.00       | 5424.10      | 0.00         | 0.54        | 0.00         | 818.32       | 0.00         | 1.19         |
| <b>BHET</b>              | 0.00          | 0.00       | 0.00         | 0.00         | 0.00        | 0.00         | 0.00         | 29.50        | 0.00         |
| <b>MHET</b>              | 0.00          | 0.00       | 0.00         | 0.00         | 0.08        | 0.00         | 0.04         | 783.09       | 0.00         |
| <b>DMT</b>               | 0.00          | 0.00       | 1.95         | 0.00         | 19448.59    | 14668.61     | 68.64        | 38.98        | 0.00         |
| <b>MNCL2</b>             | 0.00          | 0.00       | 0.00         | 0.00         | 0.00        | 0.00         | 0.00         | 0.00         | 0.00         |
| <b>WATER</b>             | 2.00          | 4000.00    | 5.00         | 0.00         | 0.00        | 0.00         | 0.00         | 0.00         | 3993.00      |
| <b>C6H12</b>             | 5994.00       | 6000.00    | 3.00         | 0.00         | 0.00        | 0.00         | 0.00         | 0.00         | 3.00         |
| <b>Mn<sup>2+</sup></b>   | 0.00          | 0.00       | 0.00         | 0.00         | 0.00        | 87.31        | 0.00         | 0.00         | 87.31        |
| <b>Cl<sup>-</sup></b>    | 0.00          | 0.00       | 0.00         | 0.00         | 0.00        | 112.69       | 0.00         | 0.00         | 112.69       |

**Table. S21.** Mass balance of PET methanolysis in heterogeneous system.

| <b>Stream</b>            | <b>PET</b> | <b>MEOH</b> | <b>CAT</b> | <b>0001</b> | <b>0002</b> | <b>0003</b> | <b>0004</b> | <b>0005</b> | <b>0006</b> | <b>0007</b> |
|--------------------------|------------|-------------|------------|-------------|-------------|-------------|-------------|-------------|-------------|-------------|
| <b>Temperature (°C)</b>  | 25.0       | 25.0        | 25.0       | 25.0        | 180.0       | 180.0       | 180.0       | 30.0        | 30.0        | 70.0        |
| <b>Pressure (bar)</b>    | 1.0        | 1.0         | 1.0        | 1.0         | 30.0        | 30.0        | 30.0        | 1.0         | 1.0         | 1.2         |
| <b>Mass flow (kg/hr)</b> | 20000.00   | 300000.00   | 2000.00    | 322000.00   | 322000.00   | 322000.00   | 301574.31   | 301574.31   | 300382.86   | 297968.55   |
| <b>PET</b>               | 20000.00   | 0.00        | 0.00       | 20000.00    | 20000.00    | 18425.69    | 0.00        | 0.00        | 0.00        | 0.00        |
| <b>CH3OH</b>             | 0.00       | 300000.00   | 0.00       | 300000.00   | 300000.00   | 299475.37   | 299475.37   | 299475.37   | 299475.37   | 297538.47   |
| <b>MN2O3</b>             | 0.00       | 0.00        | 2000.00    | 2000.00     | 2000.00     | 2000.00     | 0.00        | 0.00        | 0.00        | 0.00        |
| <b>EG</b>                | 0.00       | 0.00        | 0.00       | 0.00        | 0.00        | 507.77      | 507.77      | 507.77      | 507.77      | 419.53      |
| <b>BHET</b>              | 0.00       | 0.00        | 0.00       | 0.00        | 0.00        | 0.00        | 0.00        | 0.00        | 0.00        | 0.00        |
| <b>MHET</b>              | 0.00       | 0.00        | 0.00       | 0.00        | 0.00        | 2.57        | 2.57        | 2.57        | 2.57        | 0.00        |
| <b>DMT</b>               | 0.00       | 0.00        | 0.00       | 0.00        | 0.00        | 1588.60     | 1588.60     | 1588.60     | 397.15      | 10.56       |

**Table. S22.** Mass balance of PET methanolysis in heterogeneous system (continued).

| <b>Stream</b>            | <b>0008</b> | <b>0009</b> | <b>0010</b> | <b>0011</b> | <b>EGOUT</b> | <b>MEHTOUT</b> | <b>MEOH-<br/>REC</b> | <b>RCATPET</b> | <b>RDMT1</b> | <b>RDMT2</b> |
|--------------------------|-------------|-------------|-------------|-------------|--------------|----------------|----------------------|----------------|--------------|--------------|
| <b>Temperature (°C)</b>  | 70.0        | 58.6        | 182.7       | 305.1       | 146.9        | 343.8          | 65.0                 | 180.0          | 30.0         | 294.0        |
| <b>Pressure (bar)</b>    | 1.2         | 0.8         | 1.2         | 1.5         | 1.2          | 1.5            | 0.8                  | 30.0           | 1.0          | 1.2          |
| <b>Mass flow (kg/hr)</b> | 2414.31     | 1933.12     | 481.19      | 389.13      | 92.06        | 3.34           | 299901.67            | 20425.69       | 1191.45      | 385.79       |
| <b>PET</b>               | 0.00        | 0.00        | 0.00        | 0.00        | 0.00         | 0.00           | 0.00                 | 18425.69       | 0.00         | 0.00         |
| <b>CH3OH</b>             | 1936.90     | 1933.03     | 3.87        | 0.00        | 3.87         | 0.00           | 299471.50            | 0.00           | 0.00         | 0.00         |
| <b>MN2O3</b>             | 0.00        | 0.00        | 0.00        | 0.00        | 0.00         | 0.00           | 0.00                 | 2000.00        | 0.00         | 0.00         |
| <b>EG</b>                | 88.24       | 0.09        | 88.15       | 0.01        | 88.14        | 0.00           | 419.62               | 0.00           | 0.00         | 0.01         |
| <b>BHET</b>              | 0.00        | 0.00        | 0.00        | 0.00        | 0.00         | 0.00           | 0.00                 | 0.00           | 0.00         | 0.00         |
| <b>MHET</b>              | 2.57        | 0.00        | 2.57        | 2.57        | 0.00         | 2.57           | 0.00                 | 0.00           | 0.00         | 0.00         |
| <b>DMT</b>               | 386.59      | 0.00        | 386.59      | 386.55      | 0.04         | 0.77           | 10.56                | 0.00           | 1191.45      | 385.78       |

**Table. S23.** Comparison of economic balance.

| <b>Category</b>                 | <b>unit</b> | <b>Synergistic system</b> | <b>Heterogeneous system</b> |
|---------------------------------|-------------|---------------------------|-----------------------------|
| <b>Total Capital Cost</b>       | [USD/Year]  | 10895750                  | 8302370                     |
|                                 | [CNY/Year]  | 75616500                  | 57618400                    |
| <b>Total Operating Cost</b>     | [USD/Year]  | 1415787900                | 1300530000                  |
|                                 | [CNY/Year]  | 9825568000                | 9025678200                  |
| <b>Total Raw Materials Cost</b> | [USD/Year]  | 1234100000                | 1182510000                  |
|                                 | [CNY/Year]  | 8564654000                | 8206619400                  |
| <b>Total Product Sales</b>      | [USD/Year]  | 1710640000                | 1217780000                  |
|                                 | [CNY/Year]  | 11871841600               | 8451393200                  |
| <b>Total Utilities Cost</b>     | [USD/Year]  | 21993500                  | 19874900                    |
|                                 | [CNY/Year]  | 152635100                 | 137931800                   |
| <b>Equipment Cost</b>           | [USD]       | 4433800                   | 3792100                     |
|                                 | [CNY]       | 30770500                  | 26317100                    |
| <b>Total Installed Cost</b>     | [USD]       | 7854100                   | 6563600                     |
|                                 | [CNY]       | 54507400                  | 45551300                    |
| <b>P.O. Period [Year]</b>       |             | 5.8                       | Unprofitable                |

*Note:* This study evaluated the economic feasibility of the two processes using the built-in economic analysis module in Aspen Plus V14. The prices of raw materials and products were referenced from the published quotations of reagent suppliers such as Shanghai Aladdin and common market procurement prices, while the utility costs were based on the built-in energy prices of the software.

**Table. S24.** Comparison of electricity consumption.

|                                 | <b>Name</b>   | <b>Fluid</b> | <b>Rate</b>    | <b>Cost per Hour</b><br>[USD/H] | <b>Cost per Hour</b><br>[CNY/H] |
|---------------------------------|---------------|--------------|----------------|---------------------------------|---------------------------------|
|                                 | Electricity   |              | 201.52 [KW]    | 15.62                           | 108.40                          |
| <b>Synergistic<br/>system</b>   | Cooling Water | Water        | 1.23 [MMGAL/H] | 147.96                          | 1026.84                         |
|                                 | Steam @165PSI | Steam        | 230.00 [KLB/H] | 2244.77                         | 15578.70                        |
|                                 | Steam @400PSI | Steam        | 8.24 [KLB/H]   | 96.54                           | 669.99                          |
| <b>Heterogeneous<br/>system</b> | Electricity   |              | 201.52 [KW]    | 15.62                           | 108.40                          |
|                                 | Cooling Water | Water        | 1.10 [MMGAL/H] | 132.34                          | 918.44                          |
|                                 | Steam @165PSI | Steam        | 217.14 [KLB/H] | 2119.32                         | 14708.08                        |

**Table. S25.** Details of tower equipment parameters.

|                             | <b>Item Description</b>                  | <b>TOWER3</b> | <b>TOWER2</b> | <b>TOWER1</b> |
|-----------------------------|------------------------------------------|---------------|---------------|---------------|
| <b>Synergistic system</b>   | Diameter Bottom section [meter]          | 1.3716        | 0.6096        | 0.4572        |
|                             | Bottom tangent to tangent height [meter] | 29.8704       | 18.288        | 20.1168       |
|                             | Design gauge pressure Bottom [barg]      | 2.434211      | 2.4342108     | 2.4342108     |
|                             | Design temperature Bottom [°C]           | 330.0779      | 330.077925    | 236.4711078   |
|                             | Operating temperature Bottom [°C]        | 302.3001      | 302.3001472   | 208.69333     |
|                             | Number of trays Bottom section           | 43            | 24            | 27            |
|                             | Bottom Tray type                         | SIEVE         | SIEVE         | SIEVE         |
|                             | Bottom Tray spacing [meter]              | 0.6096        | 0.6096        | 0.6096        |
| <b>Heterogeneous system</b> | Diameter Bottom section [meter]          | 0.4572        | 0.4572        | 0.4572        |
|                             | Bottom tangent to tangent height [meter] | 21.336        | 18.8976       | 32.9184       |
|                             | Design gauge pressure Bottom [barg]      | 2.4342108     | 2.4342108     | 2.4342108     |
|                             | Design temperature Bottom [°C]           | 371.5551      | 332.9184939   | 121.1111111   |
|                             | Operating temperature Bottom [°C]        | 343.7773222   | 305.1407161   | 70            |
|                             | Number of trays Bottom section           | 29            | 25            | 48            |
|                             | Bottom Tray type                         | SIEVE         | SIEVE         | SIEVE         |
|                             | Bottom Tray spacing [meter]              | 0.6096        | 0.6096        | 0.6096        |

**Table. S26.** Comparison of equipment installation cost.

|                             | Operational Unit | Equipment Cost [USD] | Equipment Cost [CNY] | Installed Cost [USD] | Installed Cost [CNY] | Equipment Weight [LBS] | Installed Weight [LBS] | Utility Cost [USD/HR] | Utility Cost [CNY/HR] |
|-----------------------------|------------------|----------------------|----------------------|----------------------|----------------------|------------------------|------------------------|-----------------------|-----------------------|
| <b>Synergistic system</b>   | TOWER3           | 310600               | 2155564              | 672500               | 4667150              | 51000                  | 97979                  | 0                     | 0                     |
|                             | FLASH1           | 435700               | 3023758              | 830600               | 5764364              | 114800                 | 168007                 | 0                     | 0                     |
|                             | HEATER2          | 22800                | 158232               | 116800               | 810592               | 2700                   | 15500                  | 96.54                 | 669.9876              |
|                             | 1-Sep            | 284100               | 1971654              | 554900               | 3851006              | 90000                  | 132220                 | 0                     | 0                     |
|                             | TOWER2           | 114000               | 791160               | 333900               | 2317266              | 15300                  | 37199                  | 0                     | 0                     |
|                             | COOLER1          | 1528200              | 10605708             | 2105000              | 14608700             | 289600                 | 395664                 | 147.96                | 1026.8424             |
|                             | HEATER           | 666900               | 4628286              | 1043800              | 7243972              | 117800                 | 187272                 | 2244.77               | 15578.704             |
|                             | TOWER1           | 124600               | 864724               | 337100               | 2339474              | 24000                  | 42817                  | 0                     | 0                     |
|                             | 3-Sep            | 26200                | 181828               | 173500               | 1204090              | 3100                   | 15354                  | 0                     | 0                     |
|                             | REACTOR          | 776800               | 5390992              | 1108200              | 7690908              | 136300                 | 179901                 | 0                     | 0                     |
| 2-Sep                       | 118500           | 822390               | 388100               | 2693414              | 27200                | 55658                  | 0                      | 0                     |                       |
| <b>Heterogeneous system</b> | TOWER3           | 152000               | 1054880              | 455800               | 3163252              | 29800                  | 51853                  | 0                     | 0                     |
|                             | FLASH2           | 307500               | 2134050              | 691000               | 4795540              | 70900                  | 122490                 | 0                     | 0                     |
|                             | COOLER1          | 970300               | 6733882              | 1382400              | 9593856              | 184600                 | 256184                 | 132.34                | 918.4396              |
|                             | 1-Sep            | 281500               | 1953610              | 551800               | 3829492              | 89000                  | 131116                 | 0                     | 0                     |
|                             | TOWER2           | 101900               | 707186               | 319200               | 2215248              | 18700                  | 39681                  | 0                     | 0                     |
|                             | FLASH1           | 118500               | 822390               | 388100               | 2693414              | 27200                  | 55658                  | 0                     | 0                     |
|                             | HEATER1          | 634900               | 4406206              | 968100               | 6718614              | 111200                 | 171055                 | 2119.32               | 14708.081             |
|                             | TOWER1           | 455600               | 3161864              | 706500               | 4903110              | 138500                 | 159942                 | 0                     | 0                     |
| REACTOR                     | 769900           | 5343106              | 1100700              | 7638858              | 134900               | 178412                 | 0                      | 0                     |                       |

**Table. S27.** Details of heat exchanger parameters.

| Item description                   | Synergistic system |         |         | Heterogeneous system |         |
|------------------------------------|--------------------|---------|---------|----------------------|---------|
|                                    | HEATER2            | COOLER1 | HEATER  | COOLER1              | HEATER1 |
| Heat transfer area [sqm]           | 32.91              | 4180.43 | 2583.07 | 2656.12              | 2437.29 |
| Tube design gauge pressure [barg]  | 30.01              | 21.29   | 12.09   | 21.29                | 12.09   |
| Tube design temperature [°C]       | 257.00             | 207.78  | 212.00  | 207.78               | 212.00  |
| Tube operating temperature [°C]    | 229.22             | 35.00   | 184.22  | 35.00                | 184.22  |
| Tube outside diameter [meter]      | 0.03               | 0.03    | 0.03    | 0.03                 | 0.03    |
| Shell design gauge pressure [barg] | 19.67              | 32.43   | 7.72    | 32.43                | 7.72    |
| Shell design temperature [°C]      | 227.78             | 207.78  | 207.78  | 207.78               | 207.78  |
| Shell operating temperature [°C]   | 200.00             | 180.00  | 180.00  | 180.00               | 180.00  |
| Tube length extended [meter]       | 6.10               | 6.10    | 6.10    | 6.10                 | 6.10    |
| Tube pitch [meter]                 | 0.03               | 0.03    | 0.03    | 0.03                 | 0.03    |

**Table. S28.** Details of reactor parameters.

| <b>Item description</b>                             | <b>Synergistic system</b> | <b>Heterogeneous system</b> |
|-----------------------------------------------------|---------------------------|-----------------------------|
|                                                     | <b>REACTOR</b>            | <b>REACTOR</b>              |
| <b>Liquid volume [L]</b>                            | 57646.39                  | 56745.67                    |
| <b>Vessel diameter [meter]</b>                      | 2.74                      | 2.74                        |
| <b>Vessel tangent to tangent<br/>height [meter]</b> | 9.75                      | 9.60                        |
| <b>Design gauge pressure [barg]</b>                 | 32.43                     | 32.43                       |
| <b>Design temperature [°C]</b>                      | 207.78                    | 207.78                      |

**Table. S29.** Detailed utility parameters

| <b>Name</b>  | <b>Type</b> | <b>Description</b>                                                                              |
|--------------|-------------|-------------------------------------------------------------------------------------------------|
| <b>AIR</b>   | Common      | Air, inlet temperature =30 °C, outlet temperature =35 °C                                        |
| <b>ELEC</b>  | Electricity | Electric utility engineering                                                                    |
| <b>LP</b>    | Steam       | Low pressure steam, inlet temperature =125 °C, outlet temperature =124 °C                       |
| <b>MP</b>    | Steam       | Medium pressure steam, inlet temperature =175 °C, outlet temperature =174 °C, pressure =127 psi |
| <b>OIL</b>   | Common      | Hot oil, inlet temperature =280 °C, outlet temperature =250 °C                                  |
| <b>WATER</b> | Water       | Cooling water, inlet temperature =20 °C, outlet temperature =25 °C                              |
