# Supplementary material
Source: Royal Society of Chemistry journal article supplement (doi:10.1039/d6gc01939k)
Supplement: d6gc01939k4.pdf [file d6gc01939k4.pdf]

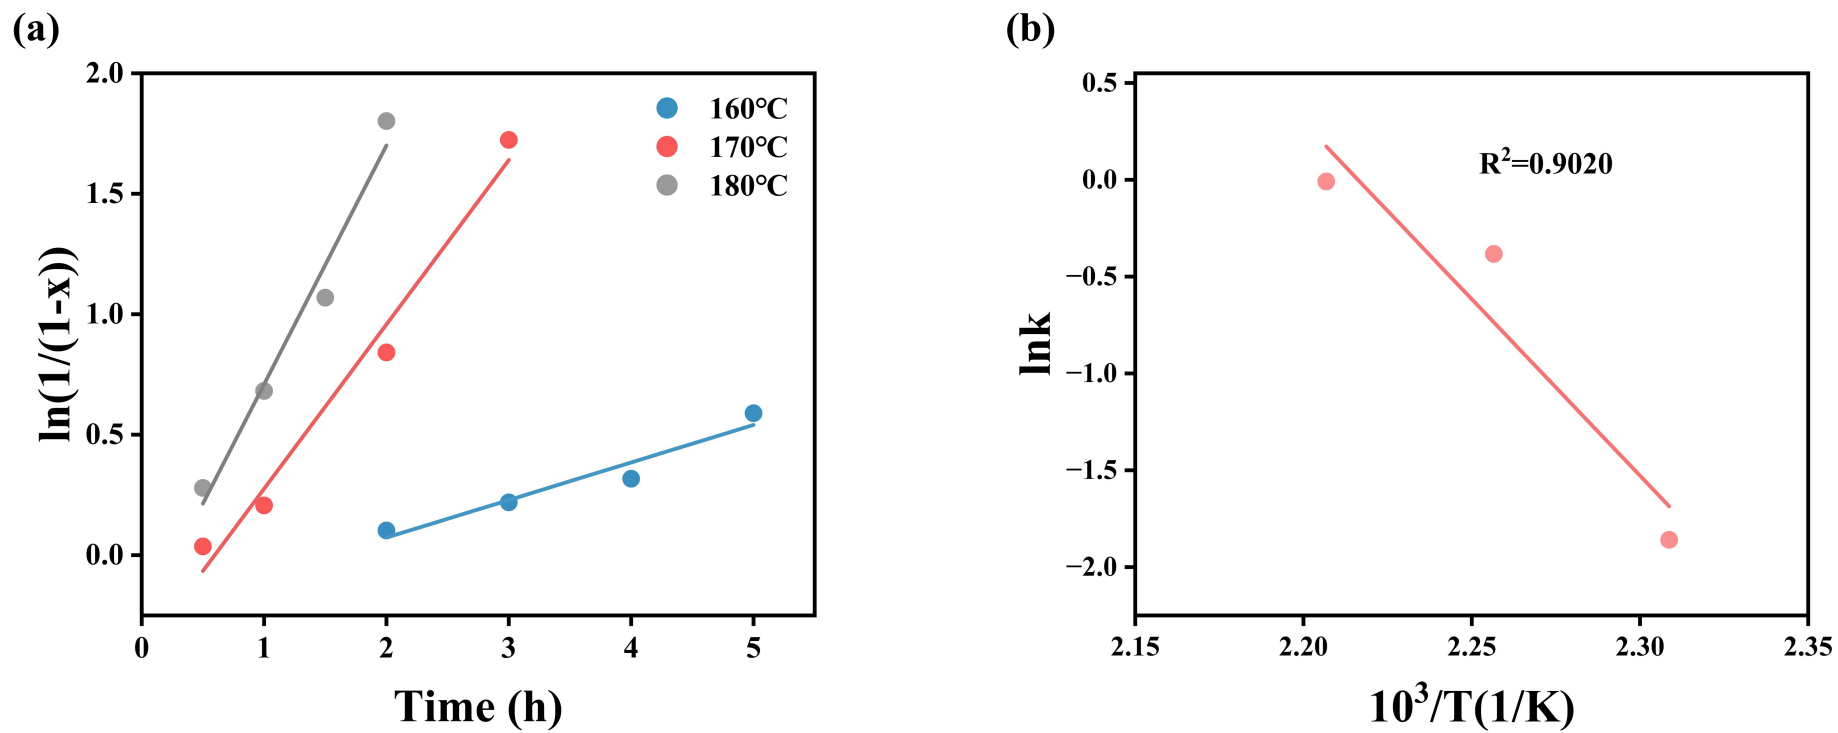

Figure. S11. (a) First-order kinetics at different temperatures; (b) Arrhenius diagram of the rate constant for PET methanolysis.
