# Supplementary material
Source: Royal Society of Chemistry journal article supplement (doi:10.1039/d6gc01939k)
Supplement: d6gc01939k8.pdf [file d6gc01939k8.pdf]

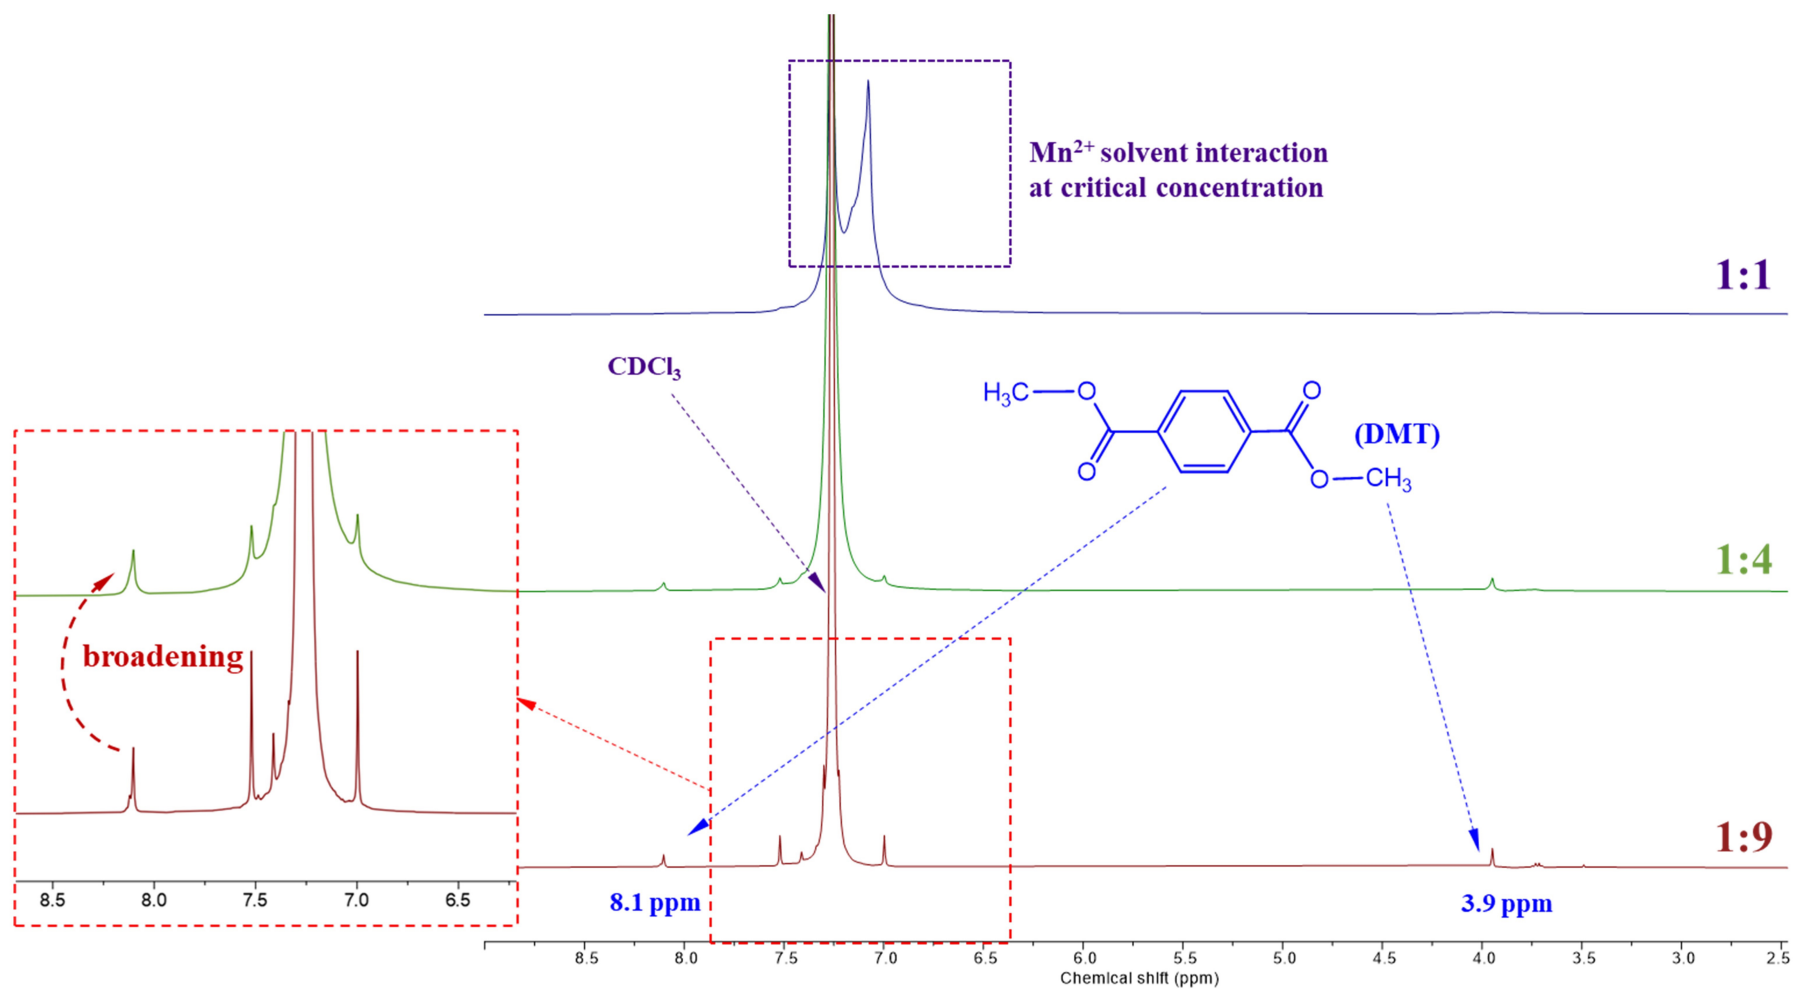

Figure. S15. <sup>1</sup>H NMR spectrum of products catalyzed by different mass ratios of MnCl<sub>2</sub>·4H<sub>2</sub>O and Mn<sub>2</sub>O<sub>3</sub> (170 °C-10wt% catalyst).
