# Supplementary material
Source: Royal Society of Chemistry journal article supplement (doi:10.1039/d6gc01939k)
Supplement: d6gc01939k11.pdf [file d6gc01939k11.pdf]

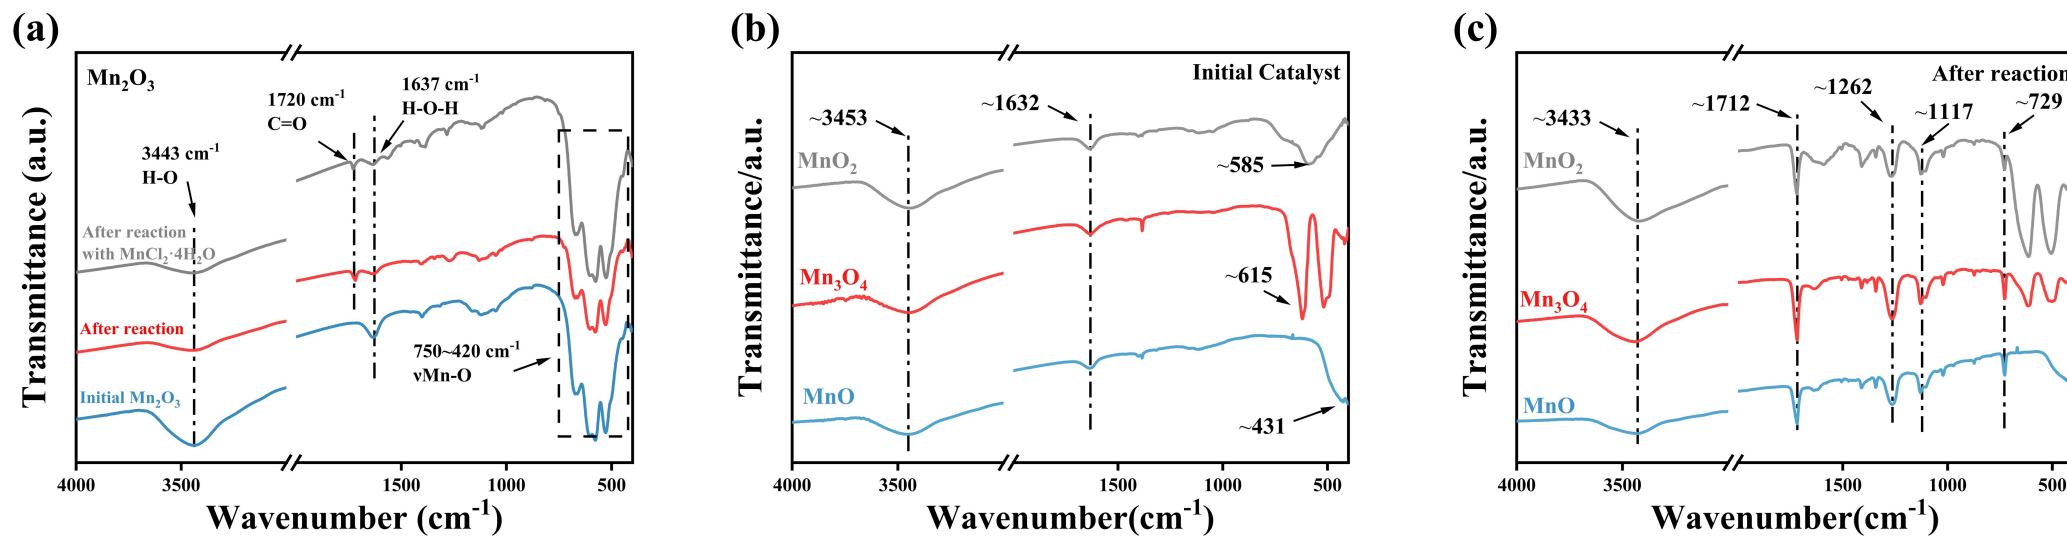

Figure. S18. (a) Infrared spectra of Mn<sub>2</sub>O<sub>3</sub> before and after reaction; infrared spectra of MnO<sub>x</sub> before (b) and after (c) synergistic reaction.
