# Supplementary material
Source: Royal Society of Chemistry journal article supplement (doi:10.1039/d6gc01939k)
Supplement: d6gc01939k15.pdf [file d6gc01939k15.pdf]

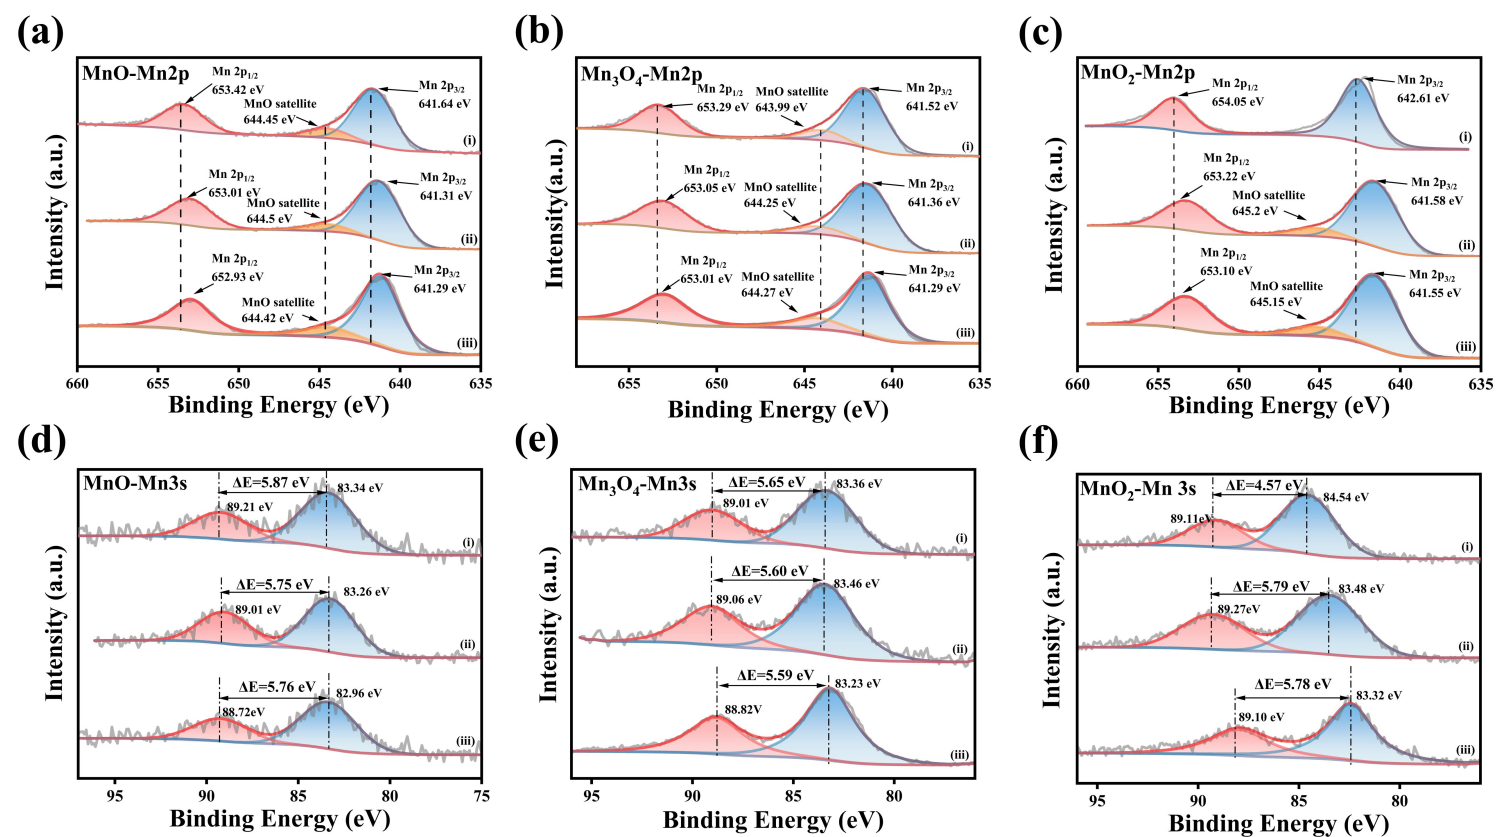

Figure. S21. XPS curves of Mn 2p: (a) MnO (b) Mn<sub>3</sub>O<sub>4</sub> (c) MnO<sub>2</sub>, and Mn 3s: (d) MnO (e) Mn<sub>3</sub>O<sub>4</sub> (f) MnO<sub>2</sub>. ((i) before reaction, (ii) after heterogeneous reaction, (iii) after synergistic reaction).
