# Supplementary material
Source: Royal Society of Chemistry journal article supplement (doi:10.1039/d6gc01939k)
Supplement: d6gc01939k22.pdf [file d6gc01939k22.pdf]

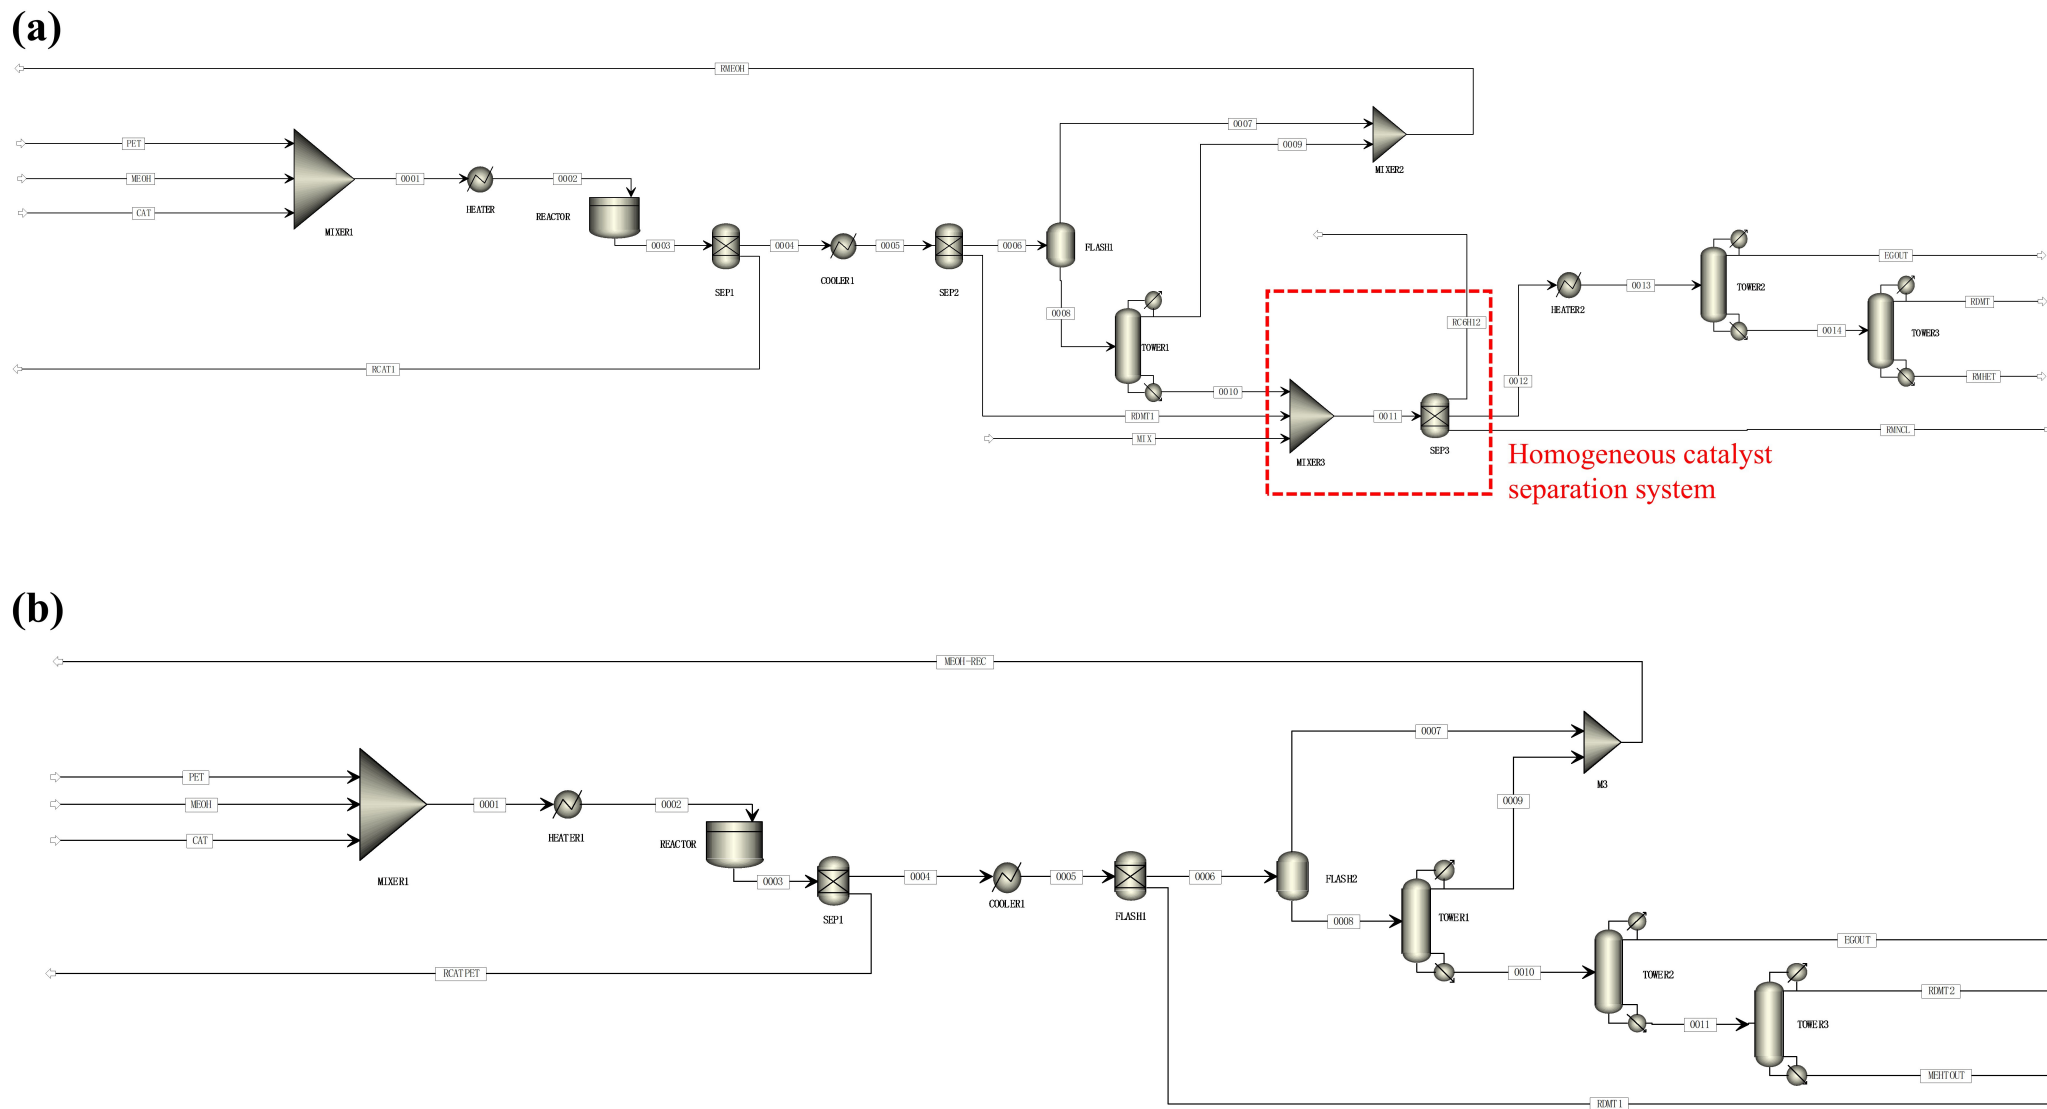

Figure. S28. Process simulation of PET methanolysis through (a) synergistic system and (b) heterogeneous system by Aspen Plus .
