# Supplementary material
Source: Royal Society of Chemistry journal article supplement (doi:10.1039/d6gc01939k)
Supplement: d6gc01939k28.pdf [file d6gc01939k28.pdf]

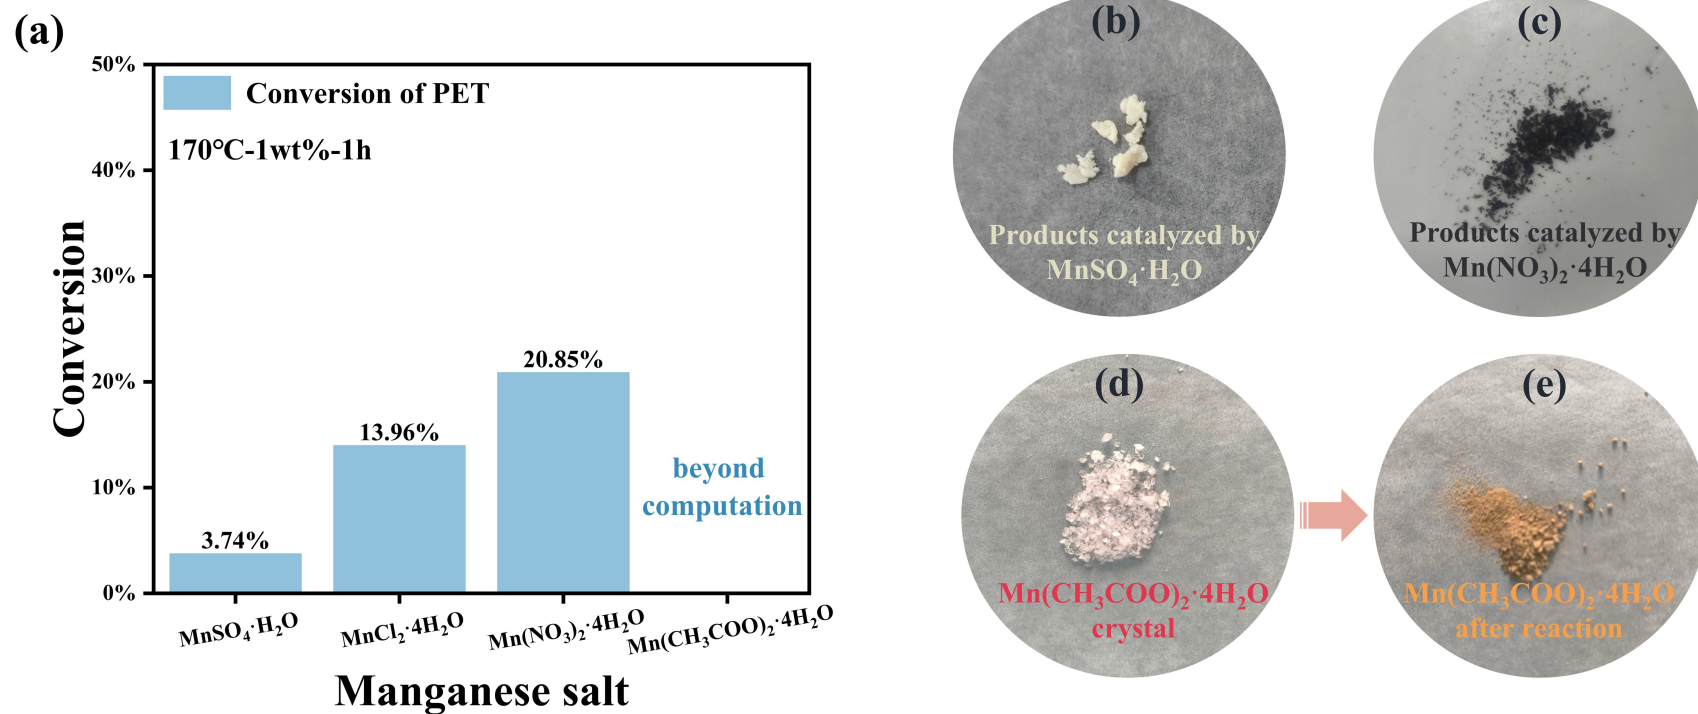

Figure. S8. (a) Degradation rate of PET catalyzed by different manganese salts; products of PET catalyzed by (b)  $\text{MnSO}_4 \cdot \text{H}_2\text{O}$  and (c)  $\text{Mn}(\text{NO}_3)_2 \cdot 4\text{H}_2\text{O}$ ;  $\text{Mn}(\text{CH}_3\text{COO})_2 \cdot 4\text{H}_2\text{O}$  (d) before and (e) after reaction.
