# Supplementary material
Source: Royal Society of Chemistry journal article supplement (doi:10.1039/d6gc01939k)

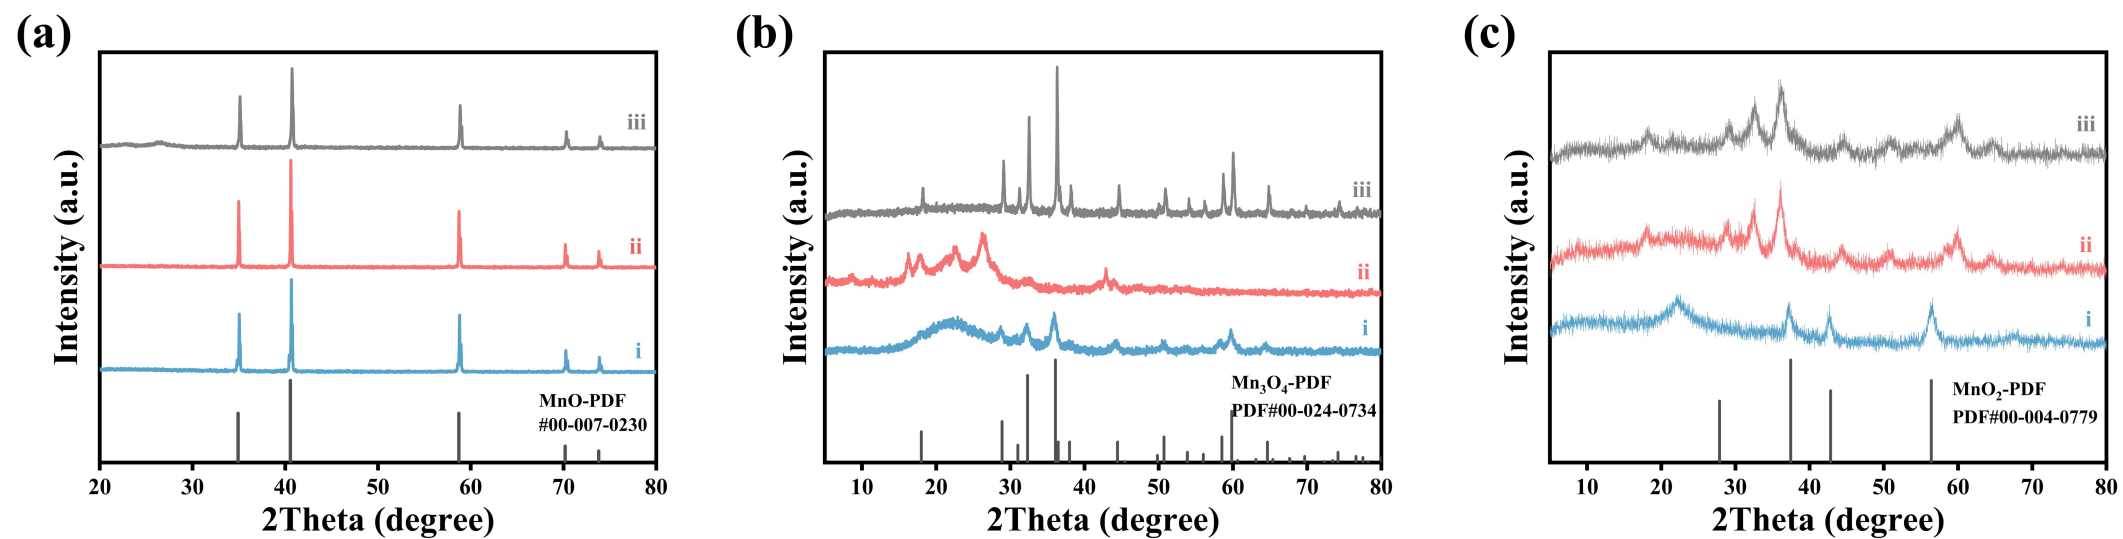

Figure. S17. XRD patterns of (a) MnO (b) Mn<sub>3</sub>O<sub>4</sub> (c) MnO<sub>2</sub> before and after reaction.

Supplement: d6gc01939k10.pdf [file d6gc01939k10.pdf]

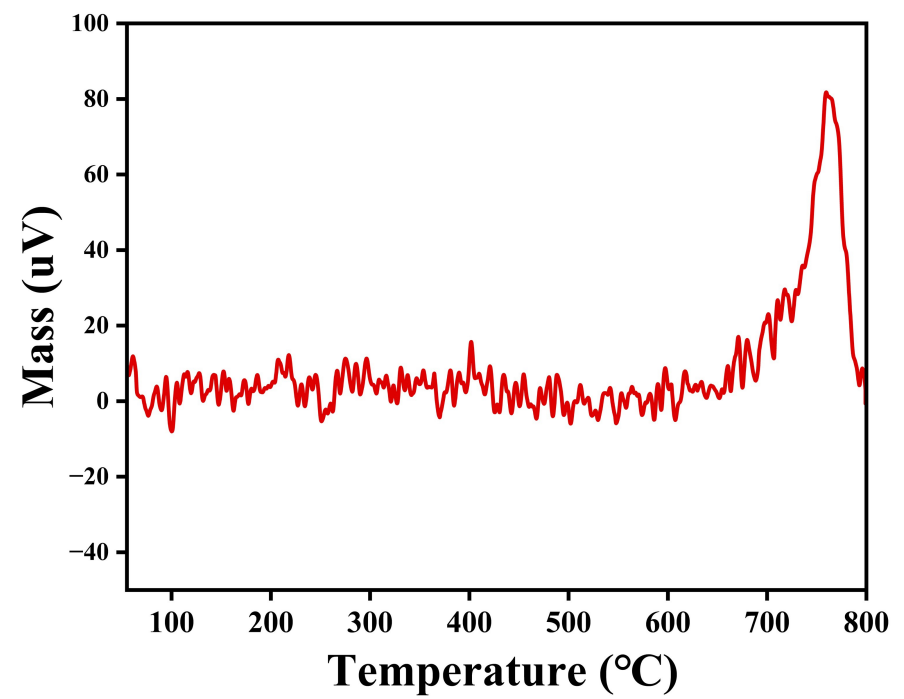

Figure. S19. CO<sub>2</sub>-TPD spectra of Mn<sub>2</sub>O<sub>3</sub>.

Supplement: d6gc01939k12.pdf [file d6gc01939k12.pdf]

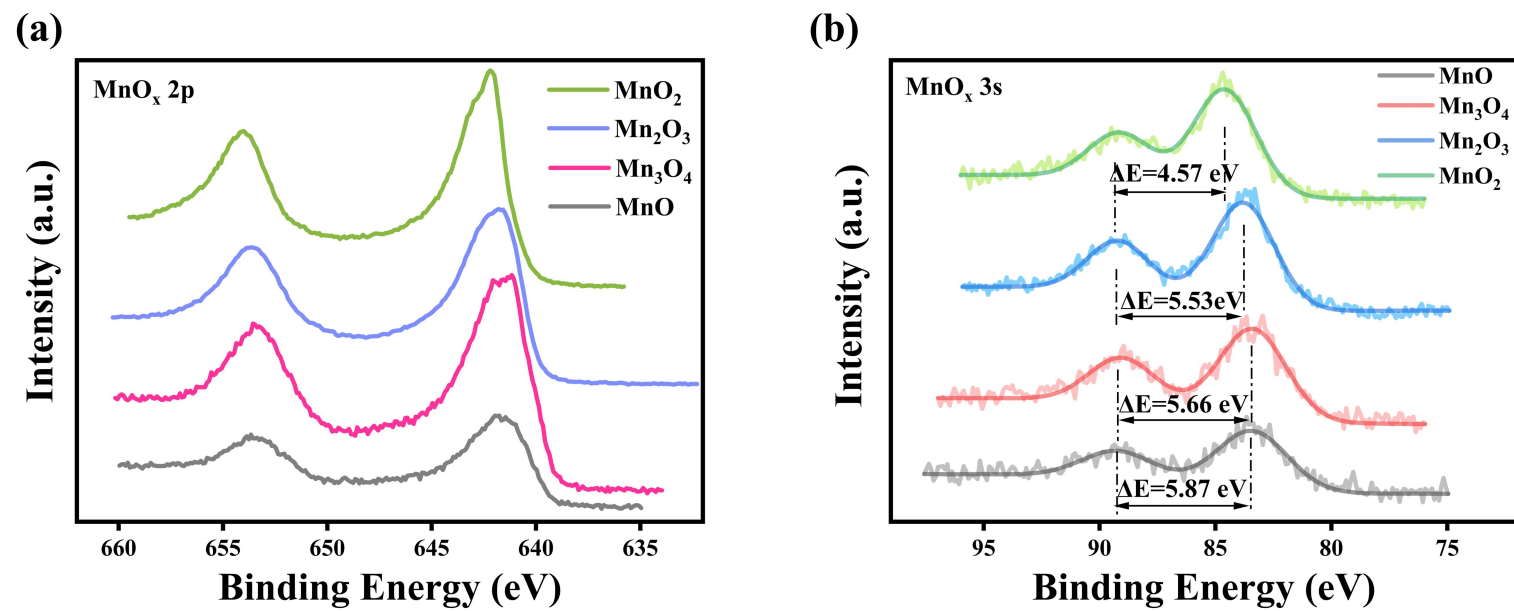

Figure. S20. Original XPS curves of MnO<sub>x</sub>: (a) Mn 2p, (b) Mn 3s.

Supplement: d6gc01939k14.pdf [file d6gc01939k14.pdf]

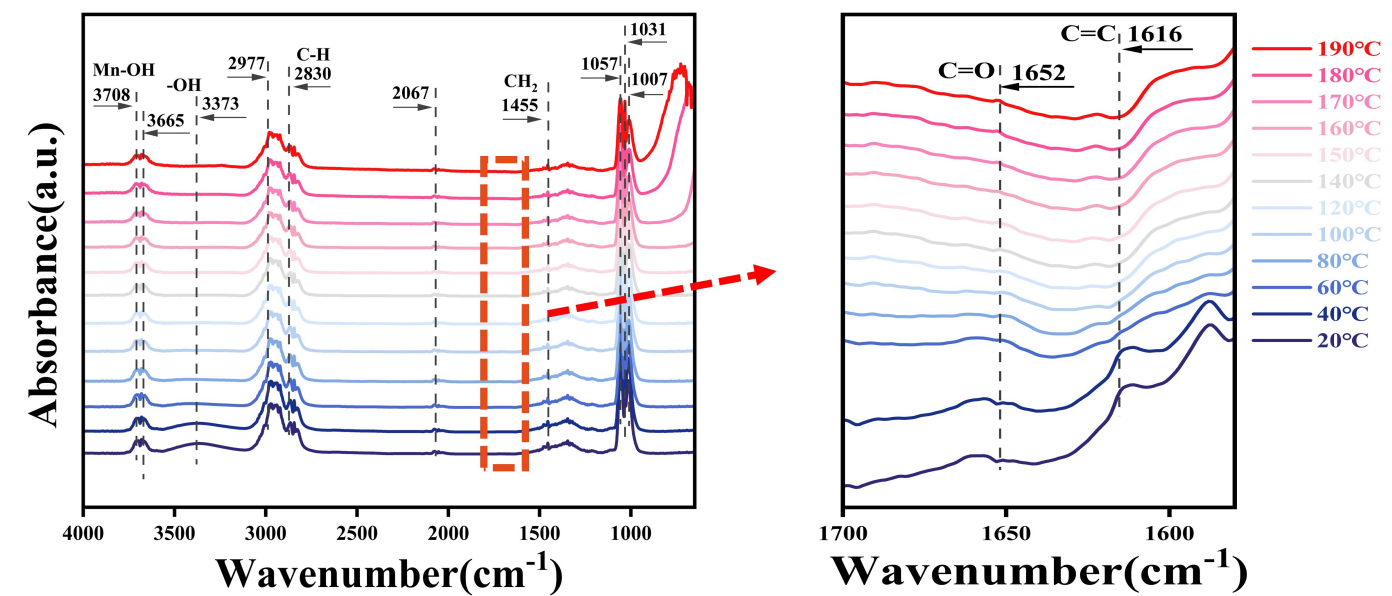

Figure. S25. *In-situ* DRIFTS of MnO alone

Supplement: d6gc01939k19.pdf [file d6gc01939k19.pdf]

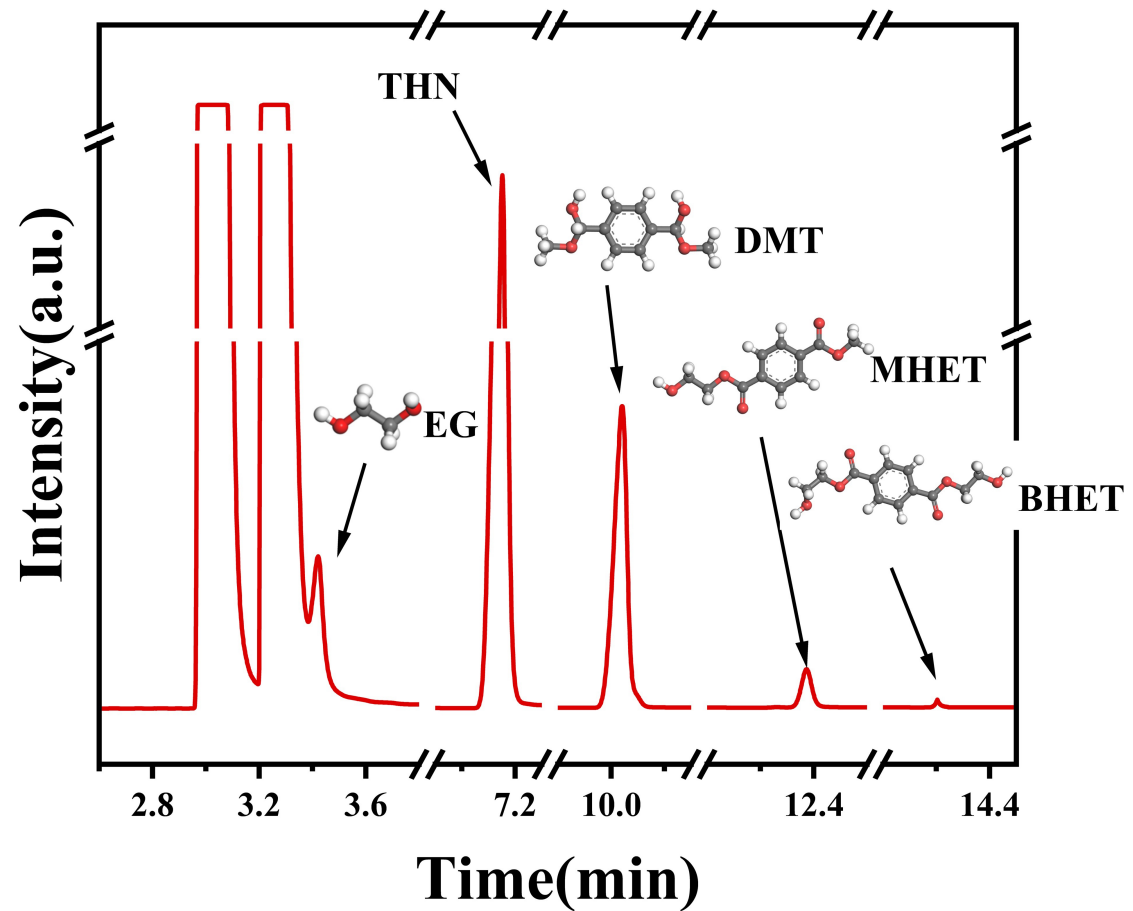

Figure. S1. Chromatographic peak sequence of products and internal standard.

Supplement: d6gc01939k2.pdf [file d6gc01939k2.pdf]

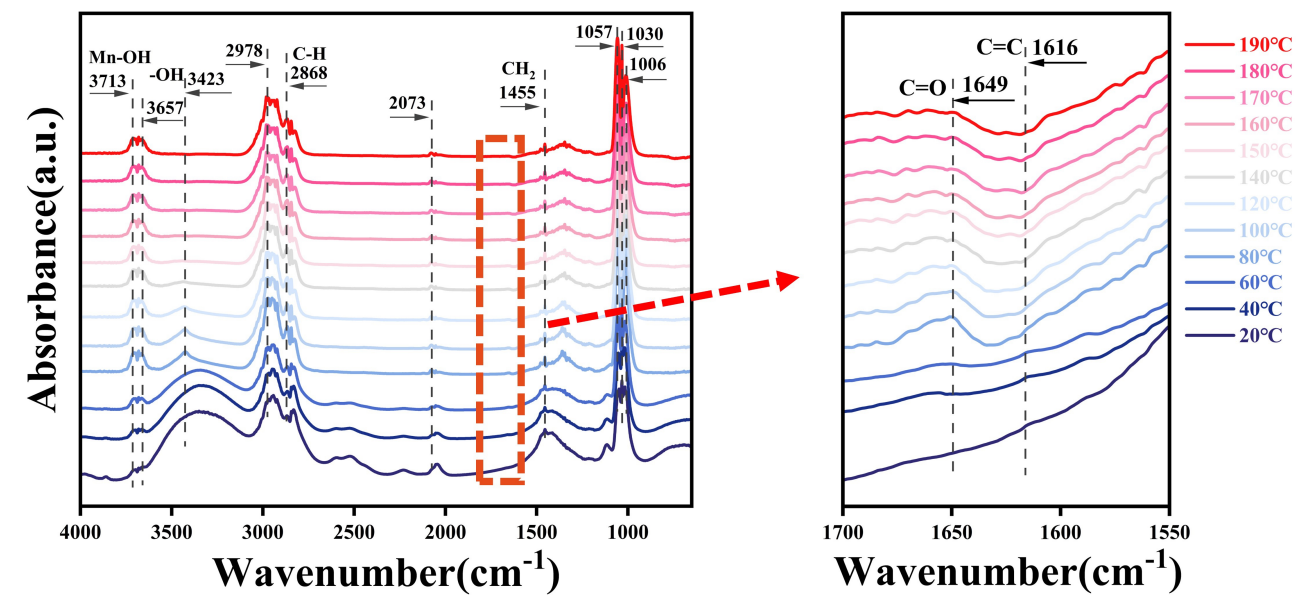

Figure. S27. *In-situ* DRIFTS of MnO<sub>2</sub> alone .

Supplement: d6gc01939k21.pdf [file d6gc01939k21.pdf]

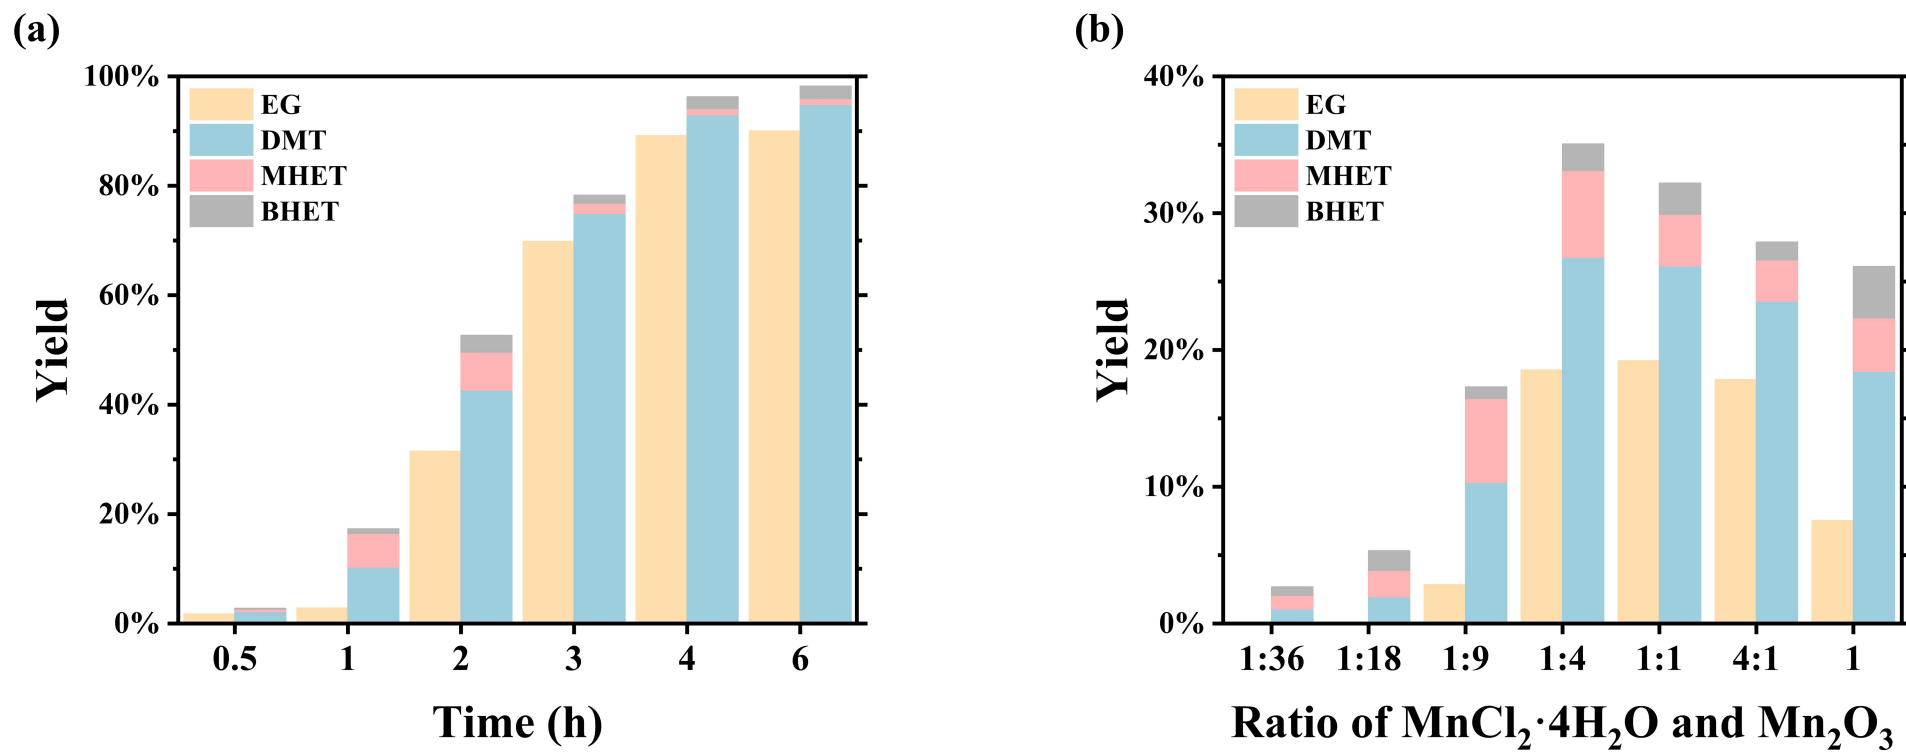

Supplement: d6gc01939k24.pdf [file d6gc01939k24.pdf]

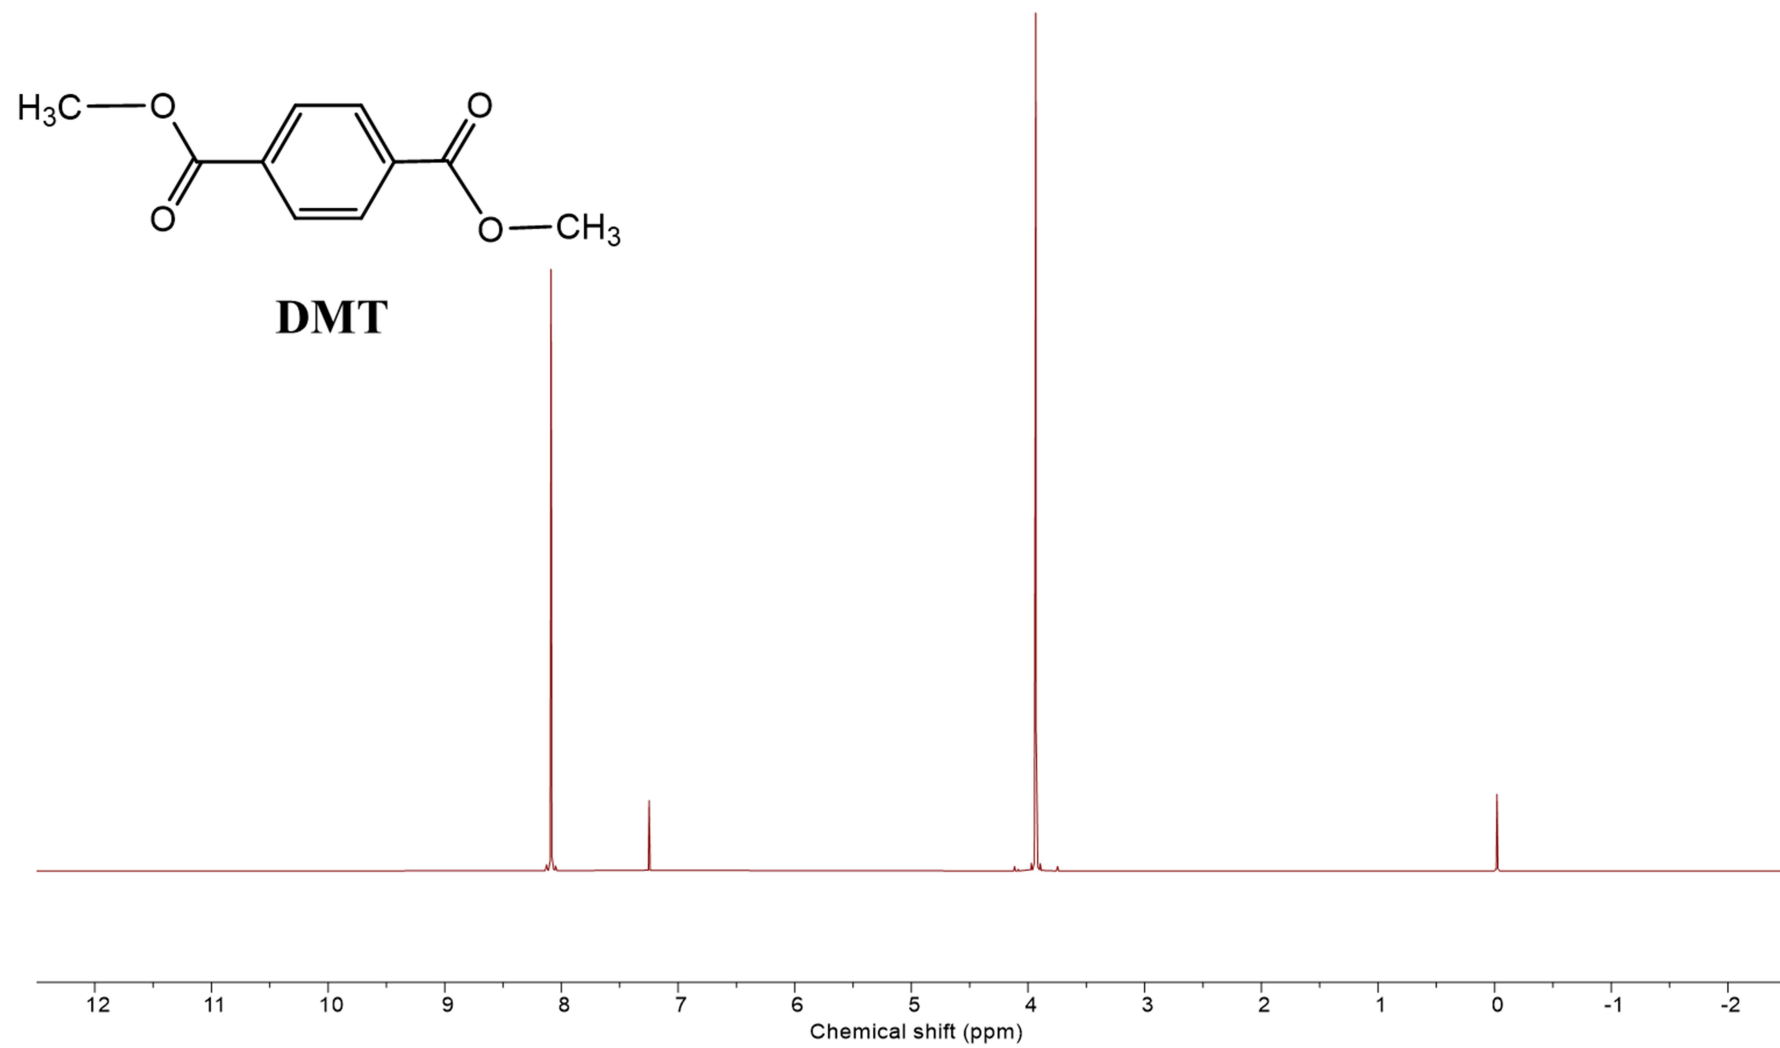Figure. S12. <sup>1</sup>H NMR spectrum of pure DMT.

Supplement: d6gc01939k5.pdf [file d6gc01939k5.pdf]
